1 **TITLE**

2 ***pop-1/TCF, ref-2/ZIC* and T-box factors regulate the development of anterior cells in the *C.***  
3 ***elegans* embryo**

4

5 **AUTHORS**

6 **Jonathan D. Rumley<sup>1</sup>, Elicia A. Preston<sup>1</sup>, Dylan Cook<sup>1</sup>, Felicia L. Peng<sup>1</sup>, Amanda L.**  
7 **Zacharias<sup>2,3</sup>, Lucy Wu<sup>1</sup>, Ilona Jileeva<sup>1</sup>, John Isaac Murray<sup>1,4</sup>**

8

9 **1. Department of Genetics, Perelman School of Medicine, University of Pennsylvania,**  
10 **Philadelphia, PA 19104**

11 **2. Division of Developmental Biology, Cincinnati Children's Hospital Medical Center,**  
12 **Cincinnati, OH 45229**

13 **3. Department of Pediatrics, University of Cincinnati College of Medicine, Cincinnati,**  
14 **OH 45267**

15 **4. Corresponding author - [jmurr@pennmedicine.upenn.edu](mailto:jmurr@pennmedicine.upenn.edu)**

16

17 **ABSTRACT**

18 Patterning of the anterior-posterior axis is fundamental to animal development. The Wnt pathway  
19 plays a major role in this process by activating the expression of posterior genes in animals from  
20 worms to humans. This observation raises the question of whether the Wnt pathway or other  
21 regulators control the expression of the many anterior-expressed genes. We found that the  
22 expression of five anterior-specific genes in *Caenorhabditis elegans* embryos depends on the Wnt  
23 pathway effectors *pop-1/TCF* and *sys-1/β-catenin*. We focused further on one of these anterior  
24 genes, *ref-2/ZIC*, a conserved transcription factor expressed in multiple anterior lineages. Live  
25 imaging of *ref-2* mutant embryos identified defects in cell division timing and position in anterior  
26 lineages. *Cis*-regulatory dissection identified three *ref-2* transcriptional enhancers, one of which is  
27 necessary and sufficient for anterior-specific expression. This enhancer is activated by the T-box  
28 transcription factors TBX-37 and TBX-38, and surprisingly, concatemered TBX-37/38 binding  
29 sites are sufficient to drive anterior-biased expression alone, despite the broad expression of TBX-  
30 37 and TBX-38. Taken together, our results highlight the diverse mechanisms used to regulate  
31 anterior expression patterns in the embryo.

32

33

## 34 INTRODUCTION

### 35 Anterior-posterior patterning regulation

36 Proper anterior-posterior patterning is critical for animal embryonic development and requires the  
37 Wnt pathway across all bilaterian animals from worms to humans. Typically, posterior cell  
38 identities are induced by posteriorly-produced Wnt ligands signaling through the canonical Wnt  
39 pathway [1]. In this pathway, signal transduction in response to Wnt activates posterior-expressed  
40 gene transcription through the transcription factor TCF and its co-activator  $\beta$ -catenin [2]. Although  
41 this conserved role for the Wnt pathway in regulating the expression of posterior genes is well  
42 documented [3], much less is known about how genes expressed in anterior cells are regulated.

43  
44 *Caenorhabditis elegans* has been widely used to study anterior-posterior patterning because it is  
45 genetically tractable, its embryonic lineage is invariant, and most of its developmental regulators  
46 are highly conserved in vertebrates and other animals [4–10]. Also, the majority of embryonic cell  
47 divisions are oriented along the anterior-posterior axis, and require the Wnt pathway to  
48 differentiate the two daughter fates [11–13]. Following each anterior-posterior cell division, the  
49 Wnt pathway is activated in the more posterior daughter cell, leading to high nuclear SYS-1/ $\beta$ -  
50 catenin and low nuclear POP-1/TCF, whereas the anterior daughter cell has low nuclear SYS-1  
51 and high nuclear POP-1 [11–13]. The combination of high nuclear SYS-1 and low nuclear POP-1  
52 in posterior cells makes it stoichiometrically favorable for POP-1 to be bound to posterior-  
53 expressed targets as a complex with SYS-1, thereby driving their expression [14–16]. In contrast,  
54 anterior cells have low nuclear SYS-1 and high nuclear POP-1; for posterior-expressed targets,  
55 this results in POP-1 being bound in the absence of SYS-1, allowing it to recruit co-repressors,  
56 including UNC-37/groucho [17] (Fig 1A). Loss of POP-1/TCF results in posterior genes having  
57 either reduced expression in posterior cells or increased expression in anterior cells, indicative of  
58 its dual roles as an activator and repressor. Loss of SYS-1/ $\beta$ -catenin results only in down-  
59 regulation of posterior genes in posterior cells, consistent with an exclusive role as a posterior  
60 activator [13]. These observations leave open the question of how anterior genes are regulated in  
61 *C. elegans*.

62

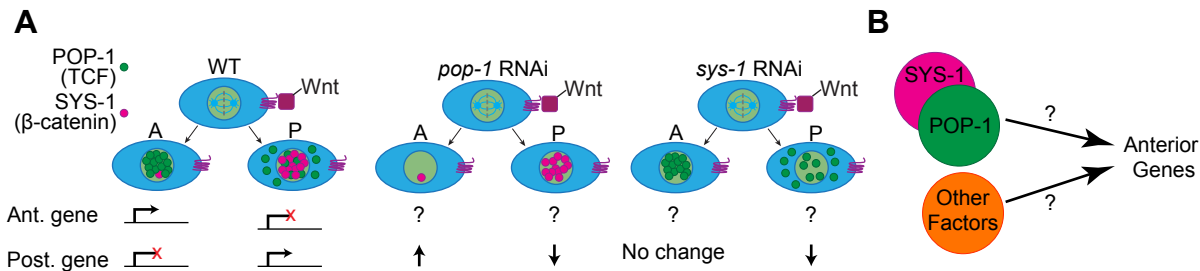

63

64 **Fig 1. How are anterior genes regulated?**

65 (A) The Wnt/β-catenin asymmetry pathway regulates anterior-posterior patterning by producing  
 66 asymmetric nuclear concentrations of POP-1/TCF and SYS-1/β-catenin in anterior and posterior  
 67 sister cells. Low nuclear concentrations of POP-1 and high nuclear concentrations of SYS-1 in the  
 68 posterior cell activate expression of posterior genes and are associated with the lack of expression  
 69 of anterior genes. Conversely, high nuclear concentrations of POP-1 and low nuclear  
 70 concentrations of SYS-1 in the anterior cell repress posterior genes and are associated with  
 71 expression of anterior genes. Effects of *pop-1* and *sys-1* RNAi on posterior genes are shown;  
 72 effects on most anterior genes are unknown. (B) In this work, we test whether *pop-1*/TCF and *sys-1*-  
 73 /β-catenin regulate anterior genes in the *C. elegans* embryo, and ask what other factors also  
 74 regulate anterior expression.

75

76

77 Previous work suggests at least three possible mechanisms by which anterior genes could be  
 78 regulated. 1) They may be regulated by the Wnt pathway indirectly, with posteriorly-expressed  
 79 canonical Wnt targets repressing the expression of anterior genes in posterior cells. 2) They may  
 80 be directly regulated by Wnt pathway components acting in a modified (or “opposite”) manner. 3)  
 81 They may be regulated by a non-Wnt-related mechanism (Fig 1B).

82

83 An example of indirect Wnt pathway regulation through a posterior repressor is seen in the *C.*  
 84 *elegans* embryonic EMS lineage, in which cells derived from the posterior daughter of EMS, E,  
 85 express the POP-1-activated, gut-specifying transcription factor *end-1*. In turn, *end-1* represses the  
 86 transcription factor *ceh-51*, which is normally expressed in and specifies the lineage derived from  
 87 the anterior daughter of EMS, MS [18,19].

88

89 Conversely, the *C. elegans* anterior gene *ttx-3* is directly regulated by Wnt pathway components.  
 90 *ttx-3* helps specify the AIY neuron class and is regulated by POP-1 and SYS-1 in a manner  
 91 dependent on the sole *C. elegans* ZIC family transcription factor REF-2 [20]. After the AIY  
 92 grandmother divides, *ttx-3* is expressed in the anterior daughter, the AIY mother, but not in the  
 93 posterior daughter. In the AIY mother, the Wnt pathway is inactive, with low nuclear SYS-1 and

94 high nuclear POP-1, and both *pop-1* and *ref-2* are required to activate *ttx-3* expression. In its  
95 posterior sister, the Wnt pathway is active, with high nuclear SYS-1 levels and low nuclear POP-  
96 1 levels, and *sys-1* is required to repress expression of *ttx-3*. Furthermore, POP-1 and REF-2 can  
97 directly interact, suggesting that REF-2 and POP-1 bind as a complex to activate *ttx-3* expression  
98 in the AIY mother. The role of SYS-1 is less clear but some evidence suggests SYS-1 may bind to  
99 the POP-1/REF-2 complex to repress expression, or may sequester away the limited POP-1, such  
100 that POP-1 cannot interact with REF-2 [20,21]. Similar regulation, termed “opposite Wnt  
101 regulation”, has also been seen in other organisms such as *Drosophila* [22].

102

103 Because of the role of POP-1 and SYS-1 in regulating the anterior-specific expression of *ttx-3*, we  
104 hypothesized that these genes may also regulate other anterior genes. POP-1 and SYS-1 could act  
105 as general anterior expression regulators, interacting with lineage-restricted co-regulators to ensure  
106 appropriate expression of anterior genes in the correct lineages [20,21]. We tested this by mining  
107 single-cell-resolution expression data to identify transcription factors expressed in anterior-  
108 specific patterns, and show that of five we tested, all require *pop-1* and/or *sys-1* for either anterior  
109 expression or posterior repression. We focus in more detail on a single anterior-specific gene, *ref-*  
110 *2/ZIC*. By automated lineage analysis of mutants we find that *ref-2* is required for normal cell  
111 division timing and cell position in *ref-2* expressing lineages. Embryonic expression of *ref-2* is  
112 driven by at least three developmental enhancers, two of which drive early embryonic expression  
113 and one of which drives expression in later-stage embryos. The most distal enhancer (3.9 kb  
114 upstream of the transcription start site) drives highly anterior-biased expression. Functional  
115 dissection revealed unexpected redundancy within this enhancer, and a role for the T-box  
116 transcription factors *tbx-37* and *tbx-38* in driving anterior-specific expression. Surprisingly,  
117 concatemers of a single T-box binding site reiterate much of the anterior-specific expression  
118 pattern of *ref-2* in early embryos, suggesting a key role for these genes in driving anterior  
119 expression.

120

121

## 122 RESULTS

123

### 124 **Many early embryonic transcription factors have anterior-specific expression**

125

126 We used large-scale single-cell expression databases derived from time-lapse 4D imaging of  
127 embryos expressing reporter genes to identify anterior-expressed genes (Fig 2A). We define  
128 “anterior” or “posterior” lineages as sets of related cells derived from either the more-anterior or  
129 more-posterior daughter after a specific cell division (Fig 2B). Notably, this is distinct from  
130 physical position; for example, a cell that divides near the posterior pole of the embryo gives rise  
131 to both an anterior and posterior daughter lineage, both of which are located in the posterior half  
132 of the embryo (Fig 2B, left side). Following convention [5,23], all lineage trees in this manuscript  
133 are drawn with the more anterior daughters on the left and the posterior daughters on the right of  
134 each bifurcation. Earlier studies identified a strong tendency for genes to be expressed in either  
135 multiple anterior or multiple posterior lineages during early and mid-embryogenesis; these  
136 frequently appear as “lineally repetitive” patterns, with multiple related anterior or posterior cousin  
137 lineages all expressing the same gene (e.g. *nob-1* and *ref-2* in Fig 2D,E) [24,25]. Both anterior-  
138 specific and posterior-specific gene expression were similarly common. While posterior specific  
139 genes (e.g. Fig 2D) appear to be largely regulated by canonical Wnt signaling [13], it is less clear  
140 how anterior-specific patterns are regulated. We mined existing literature and large-scale databases  
141 of fluorescent reporter expression patterns (Fig 2A) [24–26] to identify 19 conserved genes  
142 expressed in anterior lineage-specific patterns (Fig 2C); the anterior-biased expression of these  
143 genes is also seen in embryonic single-cell RNA-seq data [27].

144

145

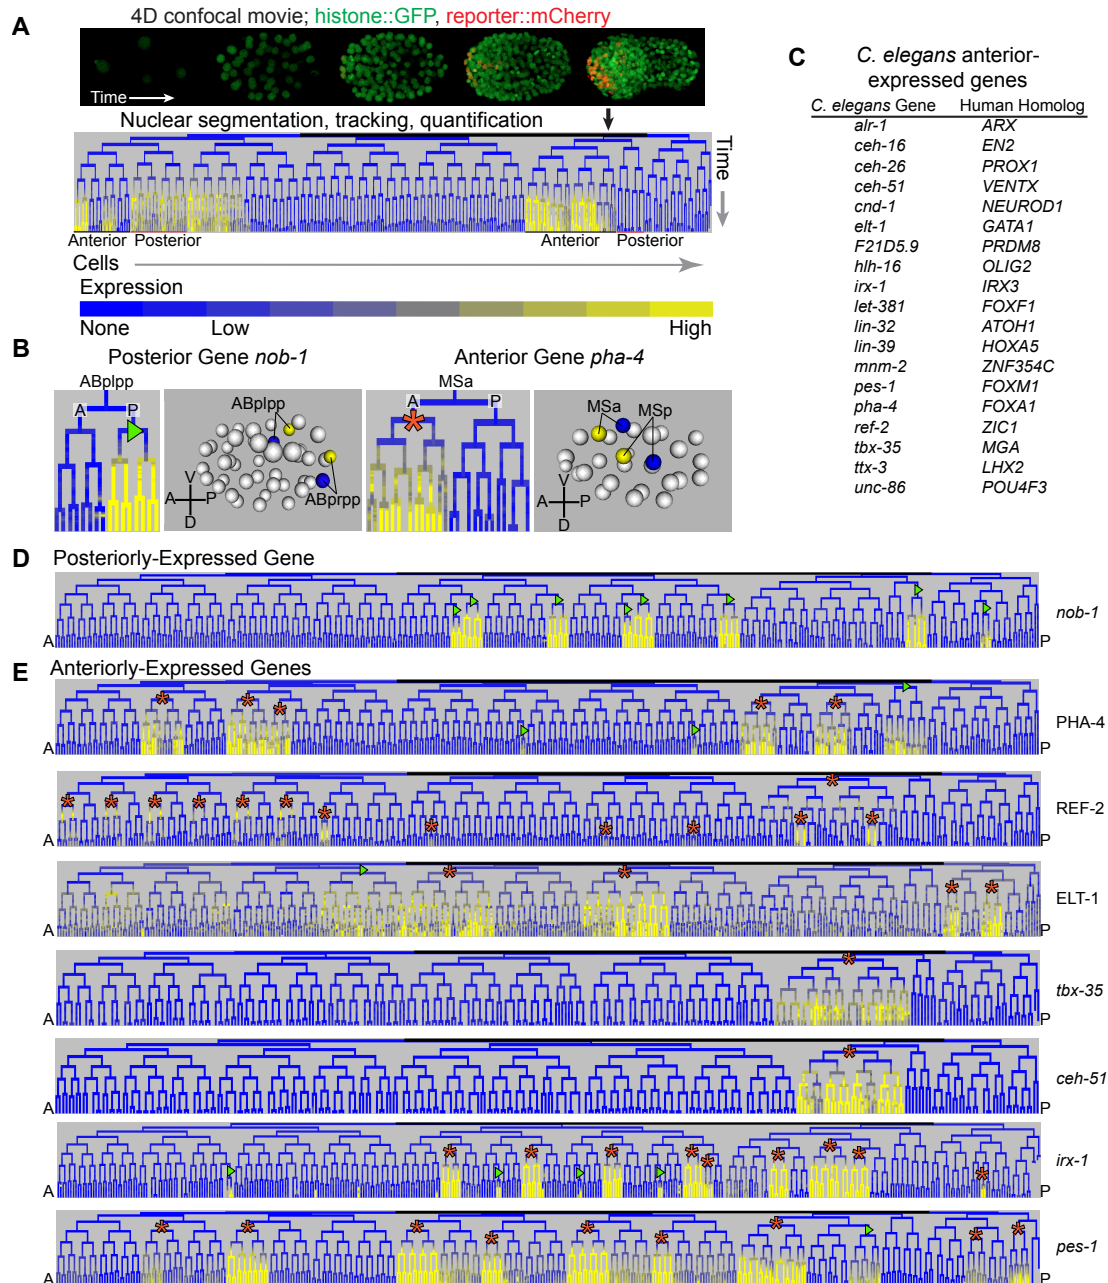

**C** *C. elegans* anterior-expressed genes

| <i>C. elegans</i> Gene | Human Homolog |
|------------------------|---------------|
| <i>alr-1</i>           | ARX           |
| <i>ceh-16</i>          | EN2           |
| <i>ceh-26</i>          | PROX1         |
| <i>ceh-51</i>          | VENTX         |
| <i>cnd-1</i>           | NEUROD1       |
| <i>elt-1</i>           | GATA1         |
| <i>F21D5.9</i>         | PRDM8         |
| <i>hlh-16</i>          | OLIG2         |
| <i>irx-1</i>           | IRX3          |
| <i>let-381</i>         | FOXF1         |
| <i>lin-32</i>          | ATOH1         |
| <i>lin-39</i>          | HOXA5         |
| <i>mnm-2</i>           | ZNF354C       |
| <i>pes-1</i>           | FOXM1         |
| <i>pha-4</i>           | FOXA1         |
| <i>ref-2</i>           | ZIC1          |
| <i>tbx-35</i>          | MGA           |
| <i>ttx-3</i>           | LHX2          |
| <i>unc-86</i>          | POU4F3        |

146

147

**Fig 2. Identification of genes with anterior-biased expression.**

148

(A) Automated lineaging traces lineages and quantifies expression from 4D confocal movies. In

149

the lineage trees, vertical lines represent cells, and horizontal lines represent cell divisions. Most

150

cells divide along the anterior-posterior axis, with anterior cells depicted on the left branch and

151

posterior cells on the right branch. (B) Posterior and anterior genes are denoted as such based on

152

their expression in cells descended from either a posterior or anterior sister cell, respectively,

153

following an anterior-posterior cell division. Anterior and posterior founder cells can generally be

154

expressed in cells from any part of the embryo. Anterior and posterior founder cells are labeled

155

with orange asterisks/green triangles respectively. (C) List of anterior-biased genes in the EPiC

156

database along with their predicted human homologs. (D) Expression pattern of a posterior gene,

157

*nob-1/Hox9-13*. (E) Expression patterns of several anterior genes; most are expressed in unique

158

combinations of mostly anterior lineages.

159 We confirmed the anterior-biased expression of seven of these by live confocal imaging followed  
160 by automated cell tracking and lineage tracing (Fig 2A, E, Fig S1, Fig S2, Fig S3) [26,28]. For  
161 each gene, we collected 3D timelapse movies of transgenic embryos expressing a histone-mCherry  
162 (*pha-4*, *ref-2*, *elt-1*, *tbx-35*, *irx-1*, and *pes-1*), or GFP (*ceh-51*) reporter under the control of  
163 upstream regulatory sequences of each gene (referred to here as “promoter reporters”). For five  
164 genes we also collected images for fosmid transgenes (*irx-1*, *elt-1*, *pha-4* and *ref-2*) or CRISPR  
165 knock-ins (*ceh-51*) in which the protein is fused to GFP and surrounded by its normal genomic  
166 context (“protein reporters”). Each embryo also contained a ubiquitously expressed second-color,  
167 histone-GFP or histone-mCherry fusion, used for cell tracking. We identified each nucleus at each  
168 time point and traced them across time using StarryNite [28,29] cell tracking software, and used  
169 AceTree [30,31] for subsequent manual error correction and validation that the extracted lineages  
170 were correct. Finally, we quantified the expression of the reporter in each nucleus at each time  
171 point (Fig 2A) [26]. The results confirm the anterior-specific expression of each gene, and, in some  
172 cases, identify previously unknown expression patterns (Fig S1, Fig S2, Fig S3). For each promoter  
173 reporter, the anterior-specific patterns were consistent, but the protein fusion reporters all had  
174 additional expressing lineages and dynamics indicative of distal enhancers and post-transcriptional  
175 regulation (Fig S1, Fig S2, Fig S3).

176

### 177 **The Wnt pathway effectors *pop-1* and *sys-1* are required for normal anterior-specific** 178 **expression**

179

180 Most genes expressed preferentially in posterior lineages require the Wnt effector transcription  
181 factor POP-1/TCF either for activation in posterior cells (together with its coactivator SYS-1/ $\beta$ -  
182 catenin) or for repression in anterior cells, and at least some are direct targets [12,13,32–35].  
183 Although *pop-1* is required for the normal expression of some anterior genes [20,32,36], it is  
184 unclear whether *pop-1* and *sys-1* are generally required for anterior-specific expression, as they  
185 are for posterior-specific expression.

186

187 To test this, we measured the expression of five anterior gene reporters (*tbx-35*, *ceh-51*, *elt-1*, *irx-*  
188 *1*, and *ref-2*) after *pop-1* and *sys-1* RNAi by live 3D imaging and lineage tracing as described  
189 above. We used promoter reporters for *tbx-35*, *ceh-51*, *irx-1*, and *ref-2* because our wild-type

190 expression data indicated these reporters are sufficient for anterior regulation (Fig S1, Fig S2, Fig  
191 S3). For *elt-1*, anterior-specific expression was more robust for the protein reporter so we tested  
192 that reporter's dependence on *pop-1* and *sys-1* (Fig 3; Fig S4).

193  
194 Reporters of two of the genes we tested, *tbx-35* and *ceh-51*, are expressed solely in the anterior  
195 lineage MS (Fig S2; Fig S4A, B), and previous qualitative expression analyses indicated that  
196 expression persists in the absence of *pop-1* [19,36,37]. Consistent with this, we detected expression  
197 of both genes in the MS lineage after *pop-1* RNAi, however this expression was significantly  
198 decreased. We also observed increased expression of both genes in the E lineage (posterior sister  
199 of MS), although this expression remained lower than both the wild-type and *pop-1* RNAi MS  
200 levels (Fig 3A, B; Fig S4A, B; Table S4). We also observe low-level ectopic expression of *tbx-35*  
201 in the E lineage under *sys-1* RNAi. These results indicate that both *tbx-35* and *ceh-51* require *pop-*  
202 *1* for full expression in the MS lineage and for repression in the E lineage (as shown previously  
203 [19,36]), and that *sys-1* is required to repress *tbx-35* in the E lineage.

204  
205 *elt-1* reporters are expressed in several early anterior lineages that primarily give rise to ectodermal  
206 fates (ABpla, ABpra, Caa and Cpa), and in one posterior lineage (ABarp) (Fig S1; Fig S4C). In  
207 the Caa and Cpa lineages, anterior lineages that express both the promoter and protein reporters,  
208 *pop-1* RNAi results in decreased *elt-1* reporter expression. However, RNAi for neither *pop-1* nor  
209 *sys-1* affects expression in their posterior sister lineages Cap and Cpp (Fig 3C; Fig S4C; Table S4).  
210 Similarly, *pop-1* RNAi results in reduced expression of the protein reporter in the ABpla and  
211 ABpra lineages, while RNAi knockdown of neither *pop-1* nor *sys-1* has much effect on their  
212 posterior sister lineages ABplp and ABprp (Fig S4C; Table S4). Thus, in both the ABp and C  
213 lineages, *pop-1* is required for anterior expression of *elt-1*, but neither *pop-1* nor *sys-1* is required  
214 for posterior repression.

215

216



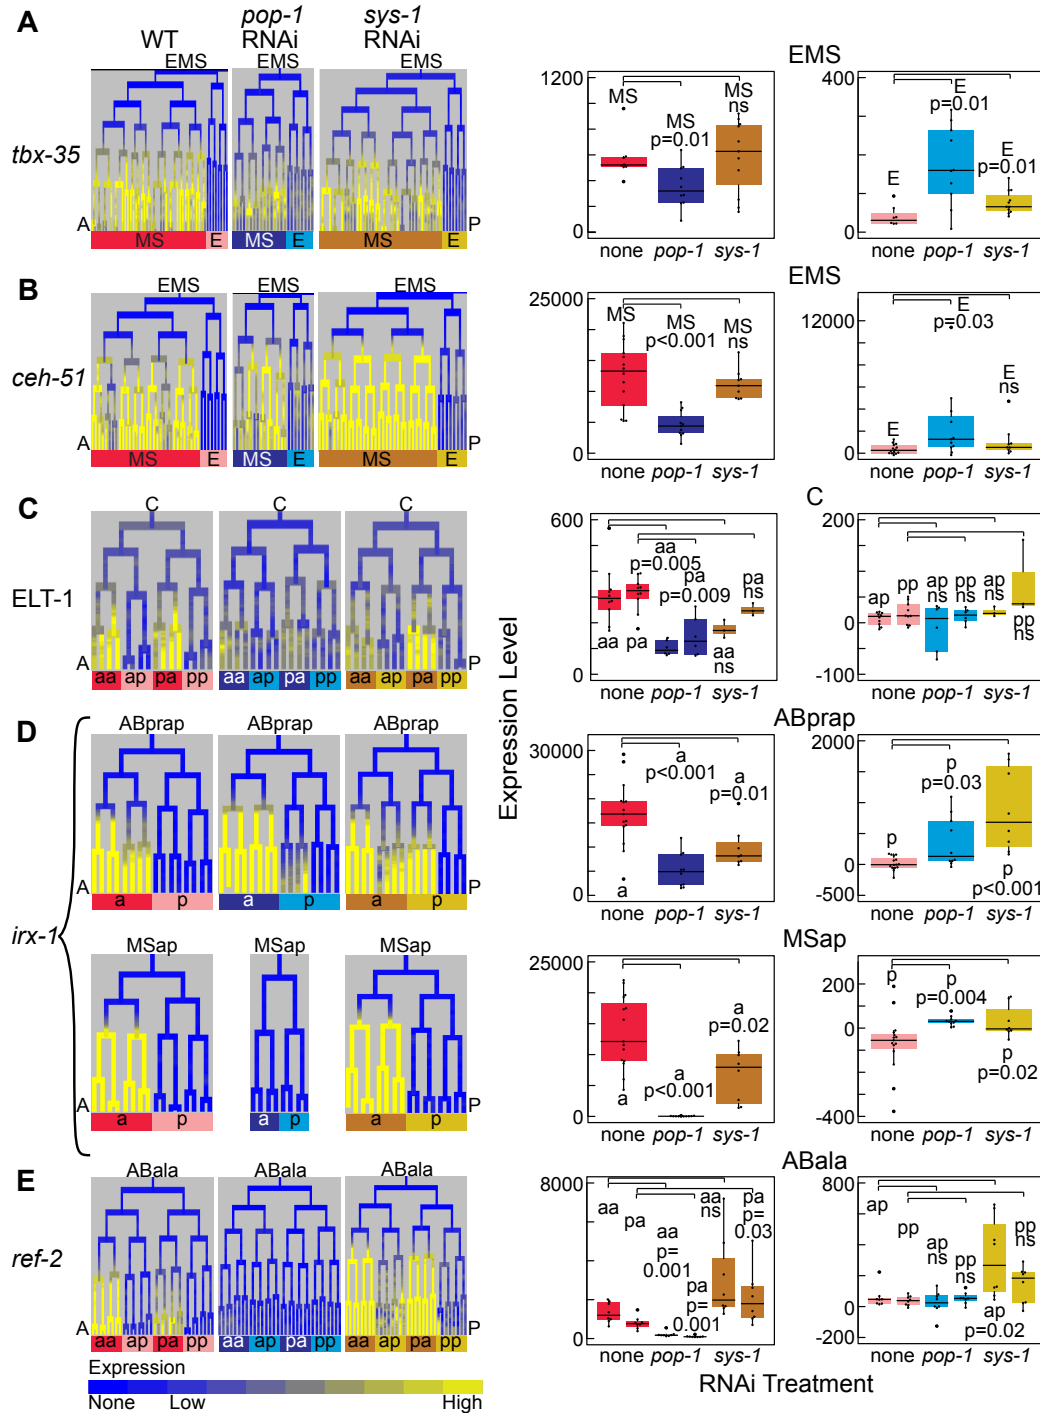

217

218 **Fig 3. Regulation of anterior genes by Wnt effectors *pop-1* and *sys-1*.**

219 (A-E) Expression pattern (left) and quantification (right) of reporters for the anterior genes *tbx-35*  
 220 (A), *ceh-51* (B), ELT-1 (C), *irx-1* (D), and *ref-2* (E) in specific anterior lineages and their posterior  
 221 sisters. Expression is shown under WT conditions and following *pop-1* or *sys-1* RNAi. Expression  
 222 quantification (right) is the mean expression across all measurements within that lineage from  
 223 when the reporter is normally first detected until the last time point indicated in the lineage (details  
 224 in Methods).

225 *irx-1* reporters are expressed early in four related anterior sublineages of ABp, and in three anterior  
226 sublineages of MS, while in later embryos they are expressed in both anterior and posterior  
227 lineages (Fig S3; Fig S4D). Like for *elt-1*, *pop-1* RNAi reduces *irx-1* reporter expression in anterior  
228 ABp-derived sublineages, and two of the MS-derived expressing sublineages lose expression  
229 nearly completely. After both *pop-1* and *sys-1* RNAi, the *irx-1* reporter expression expands into  
230 several posterior sublineages of ABp whose anterior sisters normally express *irx-1* (Fig 3D; Fig  
231 S4D; Table S4). These results indicate that *irx-1* requires *pop-1* for expression in anterior lineages  
232 and both *pop-1* and *sys-1* for repression in posterior lineages.

233

234 Reporters for *ref-2* are expressed in the early embryo in all MS descendants and in several related  
235 anterior sublineages of ABa that arise at the 50-cell stage (Fig S1; Fig S4E). In later embryos,  
236 expression occurs in two anterior sublineages of MS, in several anterior ABp-derived sublineages,  
237 and in the Pn ventral epidermal blast cells, consistent with previous studies [38]. After *pop-1*  
238 RNAi, expression of the *ref-2* promoter reporter is significantly reduced in anterior sublineages of  
239 ABa (Fig 3E). As for other genes, *sys-1* RNAi caused de-repression of *ref-2* in several posterior  
240 sisters of the normally expressing sublineages, but we did not detect de-repression in these  
241 sublineages after *pop-1* RNAi (Fig 3E; Fig S4E; Table S4). Thus, *ref-2* requires *pop-1* for  
242 expression in anterior lineages and *sys-1* for repression in posterior lineages.

243

244 To summarize these perturbations, each anterior gene tested requires *pop-1* for full expression in  
245 anterior lineages. Several genes also require *pop-1* (*tbx-35*, *ceh-51* and *irx-1*) or *sys-1* (*tbx-35*, *irx-1*  
246 and *ref-2*) for repression in some posterior lineages. Thus, it appears that the expression of most  
247 anterior genes requires the Wnt pathway components POP-1 and SYS-1, but this dependency is  
248 complex as was seen previously for posterior genes [13].

249

250 **The anterior-specific transcription factor *ref-2/ZIC* is required for normal patterns of cell**  
251 **division and cell position in expressing lineages.**

252

253 The striking anterior-specific expression patterns observed for early embryonic TFs raises the  
254 question of whether these factors regulate the development of anterior lineages. To address this  
255 question, we focused on one anterior gene, *ref-2*. *ref-2* encodes a zinc finger transcription factor

256 homologous to mammalian ZIC genes and *Drosophila* Odd-Paired. Previous work showed that  
257 *ref-2* is required to prevent “Pn” epidermal blast cells from fusing with the major hypodermal  
258 syncytium in larval stages [38]. More recently, REF-2 was shown to activate the anterior-specific  
259 expression of the neural regulator *ttx-3* by binding the *ttx-3* cis-regulatory region and recruiting  
260 POP-1 in a manner independent of POP-1 DNA binding activity in the AIY mother cell [20]. Since  
261 *ref-2* is expressed in many other anterior lineages in early embryos, we investigated whether *ref-2*  
262 mutants have developmental defects in those lineages.

263

264 We tested for embryonic lineage phenotypes at single-cell resolution by analyzing 3D time-lapse  
265 movies of eight embryos homozygous for the deletion allele *ref-2(gkl178)* and expressing a  
266 ubiquitous histone-mCherry fusion for cell tracking. We used StarryNite to track the lineage of  
267 each embryo, and used AceTree to curate the lineages through the >550-cell stage (six embryos)  
268 or >350-cell stage (two embryos). We compared the position and cell cycle length of each cell in  
269 each embryo to those from a reference of 17 wild-type embryos [39,40] to identify outliers  
270 (“defects”) (Fig 4A).

271

272

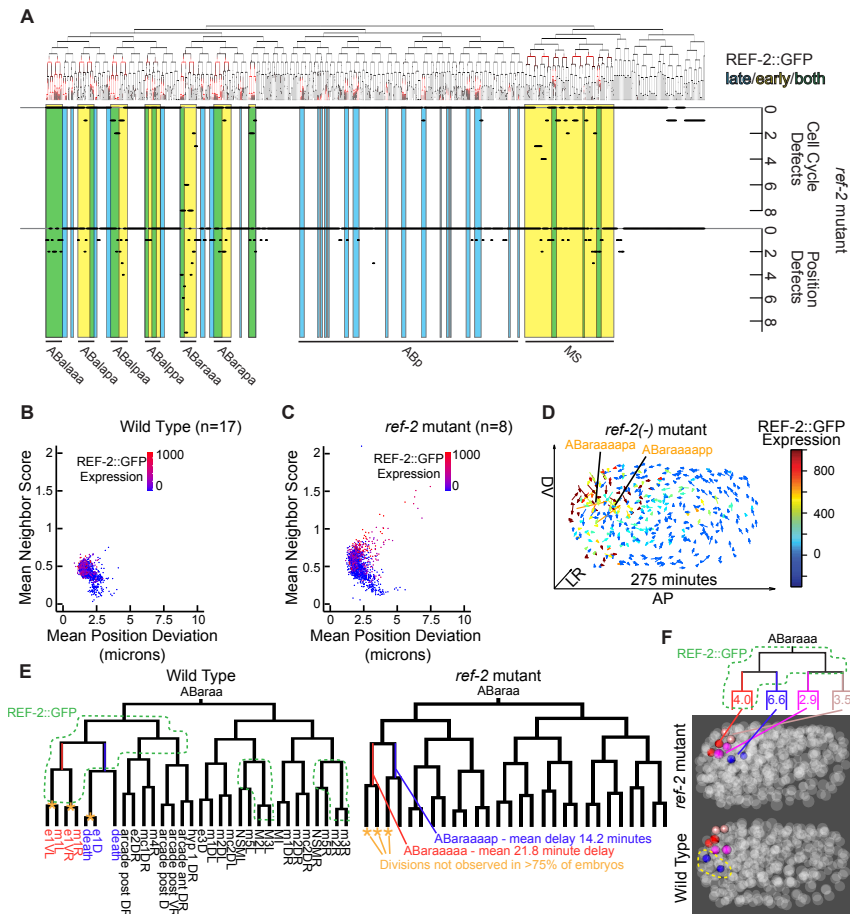

273  
274

275 **Fig 4. *ref-2* is required for proper division timing and positioning for many embryonic cells**  
276 **that are descended from cells that express *ref-2*.**

277 (A) Lineage tree depicting the REF-2 protein expression pattern (top), and chart indicating the  
278 number of embryos out of eight homozygous *ref-2* mutant embryos that exhibit cell cycle defects  
279 and position defects in indicated cell lineages. Yellow indicates lineages that express *ref-2* early,  
280 blue indicates lineages that express *ref-2* late, and the overlap (green) indicates both. A  
281 corresponding analysis of wild-type embryos gives 0-1 defects per cell in all of 17 embryos tested  
282 [39]. (B-C) Scatter plot of mean neighbor score vs mean position deviation of cells of 17 wild-type  
283 (B) and eight *ref-2* mutant (C) embryos. Neighbor score is the ratio of each cell's distances to its  
284 ten closest wild-type neighbors between mutant and wild-type embryos. Points representing cells  
285 are colored based on WT REF-2::GFP expression levels [39]. (D) Plot of cell position deviations  
286 with arrows starting at the average WT position of cells and pointing to the average position in *ref-2*  
287 mutants. Arrows are colored by the WT expression levels of REF-2::GFP for each cell. The  
288 labeled cells (ABaraaaapa and ABaraaaapp) have the greatest mean cell position deviations. (E)  
289 ABaraaa lineages of WT and *ref-2* mutant embryos, with cells expressing REF-2::GFP outlined on  
290 the WT tree. Two delayed and three missed cell divisions are highlighted on the *ref-2* mutant tree.  
291 (F) ABaraaa lineage with cells expressing REF-2::GFP outlined. The average position deviations  
292 in microns of terminal sister cells are indicated on the terminal branches of the lineage tree. Three  
293 dimensional projections of a WT and a *ref-2* mutant embryo are shown with the positions of the  
294 terminal ABaraaa lineage cells highlighted. ABaraaaapa and ABaraaaapp are outlined in the WT  
295 embryo projection as the cells with the greatest mean position deviation in the *ref-2* mutant.

296 We identified a total of 55 cells with early, late or missing divisions, and 54 of these were derived  
297 from REF-2::GFP expressing lineages ( $P < 10^{-15}$ ). Overall 95% of cell cycle defects were delays  
298 or missed divisions, indicating a role for *ref-2* in promoting cell division. Similarly, we identified  
299 68 position defects, of which 56 were in *ref-2* expressing lineages (Fig 4B, C,  $P = 1.1 * 10^{-14}$ , chi-  
300 squared test). Ten *ref-2*-expressing cells, and no non-expressing cells, had position defects in two  
301 or more embryos. The cells with the strongest position and cell cycle length defects were from the  
302 *ref-2*-expressing anterior ABaraaa lineage, which produces primarily anterior pharynx cells (e1,  
303 m1 and arcade cells). The most frequent cell cycle length defects were in ABaraaaaa and  
304 ABaraaaap (both defective in 8 of 8 embryos), which were delayed by 21.8 minutes and 14.2  
305 minutes, respectively (Fig 4E). The largest position defects were in ABaraaaapa and ABaraaaapp,  
306 which were mispositioned on average 6 microns posterior of their wild-type position (Fig 4D,F).  
307 However, other defects were broadly distributed across *ref-2*-expressing lineages, in particular  
308 MS- and ABa-derived anterior sublineages (Fig 4A). In summary, the anterior lineage-expressed  
309 TF *ref-2* is required for the normal development of anterior lineages, although the low penetrance  
310 of many defects suggests that *ref-2* may act with other partially redundant regulators, similar to  
311 other early zygotic TFs [39,41–46].

312

### 313 **Modular enhancers control *ref-2* embryonic expression**

314

315 The anterior expression and phenotypes of *ref-2* raise the question of what sequences and  
316 regulators control this expression. To identify genomic sequences responsible for *ref-2* anterior  
317 expression, we first compared expression driven by the 31.9 kb genomic fosmid protein reporter  
318 to the shorter 4.1kb upstream (“promoter”) reporter (Fig 5A, B, C; Fig S6). In general, the patterns  
319 were similar; both are expressed broadly in the MS lineage and in multiple anterior ABa-derived  
320 sublineages. In the ABa lineage, the promoter reporter shows background expression in some  
321 posterior sister sublineages suggesting the existence of repressive sequences outside of this  
322 promoter region. Additionally, the promoter fusion reporter is detected persistently in both the MS  
323 and AB lineages, whereas protein reporter expression is detected transiently, likely reflecting the  
324 use of a stable histone-mCherry reporter for the promoter reporter. Importantly, both the REF-  
325 2::GFP protein and *ref-2* promoter reporters drive expression in progenitors of most cells defective  
326 in *ref-2* mutants.

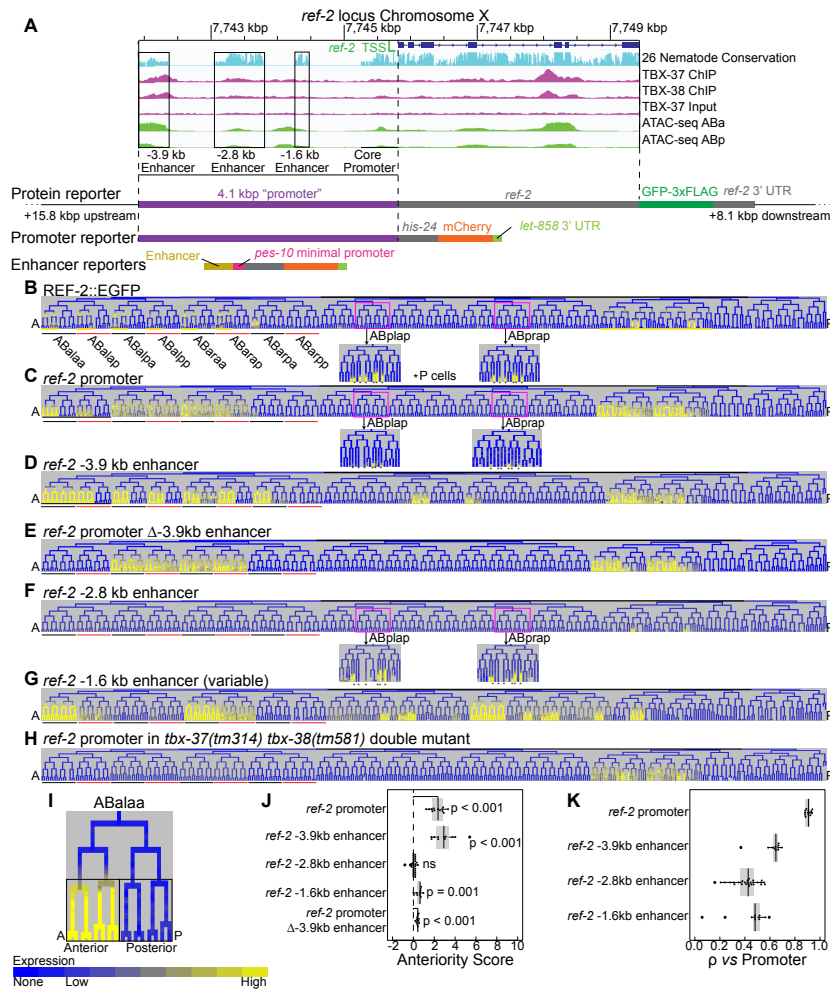

327

328

### Fig 5. Identification of *ref-2* enhancers.

329

(A) Genome browser screenshot showing the *ref-2* locus on the X chromosome. Displayed tracks include the gene model, sequence conservation among 26 *Caenorhabditis* species [49], ChIP-seq data for TBX-37 and TBX-38 binding, and ATAC-seq data for cells in the ABA and ABp lineages [50]. Boxes indicate candidate enhancer regions as determined by conservation. Below the genome browser screenshot are models of the fluorescent reporter expression constructs we examined. (B-H) Lineage trees showing the expression patterns of *ref-2* protein (B), promoter (C), -3.9 kb enhancer reporter (D), promoter lacking the -3.9 kb enhancer (E), -2.8 kb enhancer reporter (F), -1.6 kb enhancer reporter (G), and promoter in the *tbx-37 tbx-38* double mutant (H) as determined by time-lapse confocal microscopy. Sublineages used in anteriority analyses are labeled in B and underlined in black (anterior) and red (posterior) under each lineage tree. Sublineages with transient early REF-2::EGFP (protein reporter) expression are underlined in yellow under the lineage tree in B. Pn ventral epidermal cells are indicated with asterisks in insets of panels B, C, and F. (I) Example lineage showing which cells were included in anteriority score analyses. Reporter expression levels were averaged across cells in the anterior or posterior lineages for the indicated cell generations. (J) Anteriority scores of the *ref-2* promoter, enhancers, and promoter lacking the -3.9 kb enhancer. Lineages used for analysis are ABala, ABalaa, ABalap, ABalpa, ABalpp, ABaraa, ABarap, ABarpa, and ABarpp (see Fig 5B). (K) Full somatic lineage correlation (Spearman's  $\rho$ ) of each reporter's expression pattern with the mean expression pattern across embryos expressing the promoter reporter.

347

348 To identify the sequences in this region that regulate expression in these lineages, we sought to  
349 identify minimal portions of the region with enhancer activity. We identified three portions of the  
350 *ref-2* promoter conserved among *Caenorhabditis* species, suggesting they encode important  
351 functions (Fig 5A) [47–49]. The most distal of these regions is in open chromatin in ABa-derived  
352 cells as measured in a recently published ATAC-seq data set [50]. Also, this region is bound by  
353 the broadly-expressed ABa lineage transcription factors TBX-37 and TBX-38, as determined by a  
354 recently published ChIP-seq data set (Fig 5A) [50]. We fused each putative enhancer to a reporter  
355 cassette consisting of a minimal *pes-10* promoter and a *his-24::mCherry* reporter. The *pes-10*  
356 promoter is widely used, drives no consistent embryonic expression on its own [13,51,52] and is  
357 compatible with a wide variety of enhancers [13,51]. We introduced each reporter into worms and  
358 used StarryNite to determine in which cells each putative enhancer drives expression.

359

360 The most distal enhancer, located 3.9 kb upstream of the likely transcription start site, (-3.9 kb  
361 enhancer; 449 base pairs) drives early expression (during gastrulation) in several anterior  
362 sublineages of ABa and in anterior sublineages of MS (Fig 5D; Fig S6). This expression occurs in  
363 nearly identical lineages to the early portion of the protein reporter expression pattern, but while  
364 the protein reporter expression in these lineages is transient, the enhancer reporter persists, again  
365 likely because of the use of a stable histone-mCherry reporter. The -3.9 kb enhancer expression is  
366 also well correlated with the pattern driven by the full promoter of *ref-2* (Spearman's  $\rho > 0.6$ , Fig  
367 5K). Deleting this enhancer from the *ref-2* promoter reporter results in loss of the strong anterior-  
368 biased expression in the ABalaa, ABalap, and ABarpa lineages, and a loss in the weak anterior-  
369 biased expression in the ABalpa, ABalpp, ABaraa, and ABarap lineages. All remaining consistent  
370 expression occurs in the lineages derived from the Notch-signaled cells ABalp and ABara and has  
371 little anterior bias (Fig 5E, J; Fig S5; Fig S6) [46]. The significance of this expression is unclear;  
372 it can be seen in the promoter reporter but not the protein reporter, suggesting that it is normally  
373 repressed by additional sequences outside the promoter. We conclude that the -3.9 kb enhancer is  
374 necessary and sufficient for anterior-biased expression in the ABa lineage.

375

376 A second 745 bp enhancer, located at -2.8 kb, drives expression in later embryos (bean stage) in  
377 some anterior sublineages of MS and in the ABp-derived Pn ventral epidermal blast cells that were  
378 previously reported to require *ref-2* [38]. These cells also robustly express the *ref-2* protein reporter

379 and weakly express the *ref-2* promoter reporter (Fig 5B, C, F, J, K). Finally, the most proximal  
380 enhancer candidate (at -1.6 kb; 206 base pairs) drives variable, weakly anterior-biased, expression  
381 in multiple lineages, most consistently in ABala and ABara (Fig 5G, J, K; Fig S7) and also drives  
382 late expression in some ABp sublineages (Fig 5G; Fig S7). Much of this expression is in cells or  
383 at stages that do not express the full length reporters, suggesting that the activity of this sequence  
384 differs in its normal genomic context.

385  
386 To measure anterior expression bias we developed an “anteriority score” based on the log<sub>2</sub> ratio  
387 between anterior and posterior sister lineage expression. Because expression tends to accumulate  
388 over several cell cycles in each expressing lineage, we calculated this score based on the mean  
389 expression of the progeny 2-3 cell divisions after the birth of each anterior lineage (Fig 5I). Using  
390 this metric, we detected robust and significant anterior-biased expression for both the *ref-2*  
391 promoter and -3.9 kb enhancer reporters in ABa-derived sublineages, and reduced or no anterior-  
392 biased expression for the -2.8 kb and -1.6 kb enhancer reporters and for the promoter  $\Delta$  -3.9 kb  
393 enhancer reporter in the same sublineages (Fig 5J). Comparing the expression driven by each  
394 enhancer to the full promoter showed each is positively, but imperfectly, correlated, consistent  
395 with each driving a subset of the full pattern (Fig 5K).

396  
397 ***ref-2* promoter expression requires the T-box transcription factors *tbx-37* and *tbx-38***

398  
399 A dominant feature of the early *ref-2* expression pattern is reiterated expression in six of the eight  
400 anterior sister cells of the ectodermal ABa lineage at the 50 cell stage (when there are 16 ABa  
401 descendants). This expression is not observed in the fluorescent reporter strains until at least the  
402 following cell generation (when there are 32 ABa descendants) because of the time required for  
403 the fluorophores of mCherry or GFP to mature. This raises the question of whether *ref-2* expression  
404 requires the ABa-specific transcription factors *tbx-37* and *tbx-38*. These genes encode redundant  
405 paralogous T-box family transcription factors which are expressed throughout the ABa lineage  
406 and are required for multiple cell fate decisions within ABa [44,50,53]. Confirming previous  
407 reports [44,50], a TBX-38::GFP knock-in reporter made by CRISPR [50] is expressed throughout  
408 the ABa lineage and is detectable at least from the AB16 to AB128 stages (Fig S8). To test whether  
409 *tbx-37* and *tbx-38* are necessary for *ref-2* expression, we measured expression of the *ref-2* promoter



410 reporter in embryos carrying homozygous deletions of both *tbx-37* and *tbx-38*. We found that in  
411 the absence of *tbx-37* and *tbx-38*, nearly all *ref-2* promoter expression in the ABa lineage is lost  
412 (Fig 5H; Fig S9), while expression in the MS lineage was maintained. Thus, *tbx-37* and *tbx-38* are  
413 necessary for the anterior-biased expression of *ref-2* in ABa.

414

415 **The -3.9 kb enhancer contains three non-overlapping sub-enhancers that independently**  
416 **drive anterior expression in the ABa lineage**

417

418 Since the *ref-2* -3.9 kb enhancer drives expression in a similar pattern to the early expression of  
419 the full promoter and protein reporters, and its deletion from the *ref-2* promoter results in a  
420 reduction of anterior-biased expression in portions of the ABa lineage, it is a primary enhancer  
421 responsible for driving the early anterior-biased expression of *ref-2*. To map features necessary or  
422 sufficient for anterior expression, we tested the activity of eight truncated versions of the *ref-2* -  
423 3.9 kb enhancer to identify minimal regions of the enhancer sufficient to drive anterior expression  
424 in the ABa lineage (Fig 6, Fig S10). Instead of a single minimal region, we found three non-  
425 overlapping regions within the -3.9 kb enhancer that each are sufficient to drive anterior-biased  
426 enhancer activity in the ABa lineage: a promoter-distal region (bases 1 to 200), a medial region  
427 (bases 227 to 304) and a promoter-proximal region (bases 320 to 449) (Fig 6B, C). Of these  
428 regions, the proximal region drives the most consistent expression and this expression is most  
429 similar to the full length -3.9 kb enhancer construct (Fig 6D), whereas the medial and distal  
430 fragments drive more variable expression and in a subset of these lineages. Thus, although  
431 integration of information between these sub-enhancers is likely necessary for robustness of  
432 expression pattern, the 130 bp proximal fragment provides a model system for further dissection  
433 to identify anterior expression regulators.

434

435

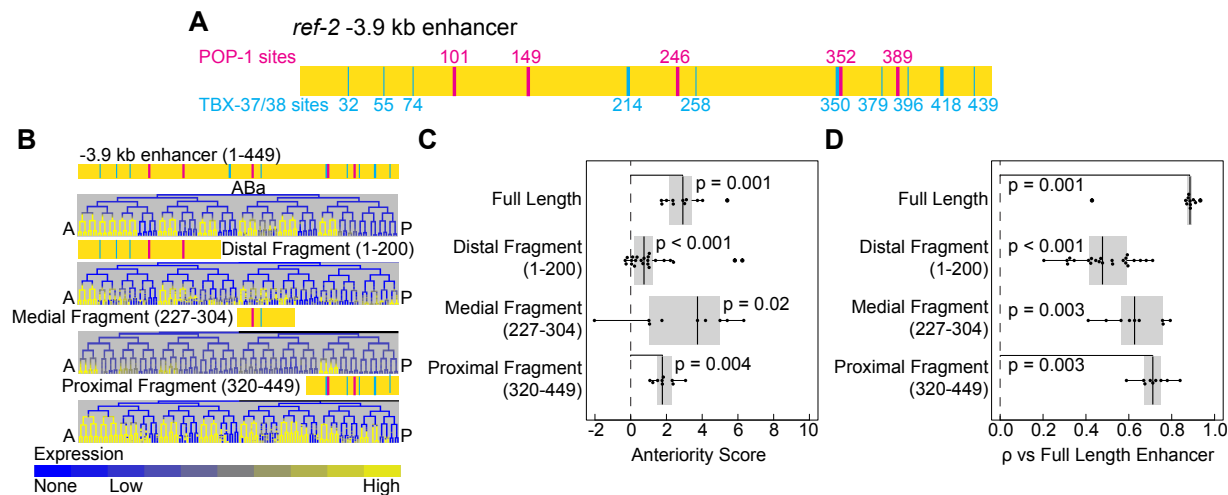

436

437 **Fig 6. Three non-overlapping fragments of the -3.9 kb enhancer are each sufficient to drive**  
 438 **anterior-biased expression in the ABA lineage of the early embryo.**

439 (A) Model of the *ref-2* -3.9 kb enhancer with predicted TBX-37/38 sites (cyan, predicted high  
 440 affinity sites indicated by thick line and predicted low-affinity by a thin line), and predicted high  
 441 affinity POP-1 sites (magenta). (B) Expression patterns driven by full-length *ref-2* -3.9 kb enhancer  
 442 and by minimal fragments. (C-D) Box plots displaying the anteriority scores (C) and Spearman's  
 443  $\rho$  (D) for the full-length *ref-2* -3.9 kb enhancer and minimal fragments. Lineages used to determine  
 444 anteriority scores are the same as in Fig 5J. Spearman's  $\rho$  analysis uses the full ABA lineage and  
 445 was calculated relative to the mean expression of the full-length -3.9 kb enhancer. A complete set  
 446 of enhancer truncations tested is displayed in Fig S10.

447

448

449 **TBX-37/38 binding sites are required for anterior expression of the proximal region**

450

451 The proximal fragment exhibits broad sequence conservation with related nematodes, suggesting  
 452 it contains multiple important TF binding sites (Fig 5A). To identify sequences necessary for  
 453 anterior expression, we scrambled each 15 base-pair region along the length of the enhancer  
 454 fragment and tested the resulting sequences for enhancer activity (Fig S11B, C, D). Scrambling a  
 455 single region comprising base pairs 410-424 (coordinates relative to the full length enhancer)  
 456 resulted in a complete loss of the anterior-biased expression in the ABA lineage, indicating that  
 457 this region is necessary for this expression (Fig 7B; Fig S11B). Scrambling the most proximal  
 458 regions 425-439 and 435-449 resulted in a loss of expression in subsets of the ABA lineage (in  
 459 ABar and ABalp) but maintained anterior expression in the ABala lineage (Fig S11B). Expression  
 460 was largely maintained when other regions were mutated, suggesting sequences in these regions  
 461 are not individually necessary for anterior-specific expression despite their conservation.

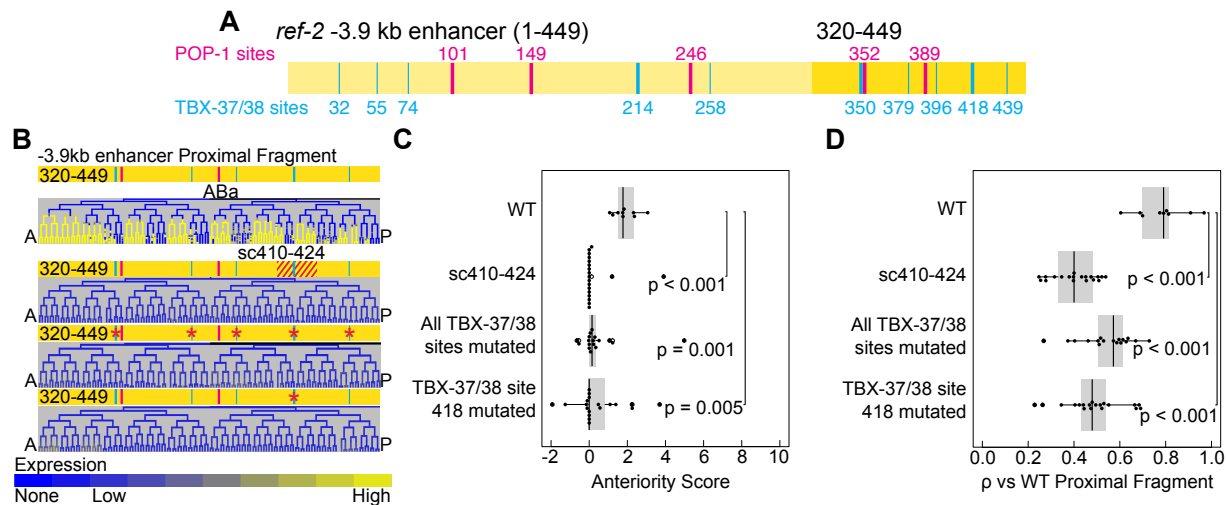

462  
463

464 **Fig 7. The ABa-expressed transcription factors *tbx-37* and *tbx-38* are required for the**  
465 **anterior-biased expression of *ref-2* in the ABa lineage.**

466 (A) Model of the *ref-2* -3.9 kb enhancer with proximal fragment (base pairs 320-449) highlighted.  
467 Predicted TBX-37/38 and POP-1 sites are indicated as in Fig 6. (B) Expression patterns driven by  
468 the WT proximal fragment of the *ref-2* -3.9 kb enhancer, with base pairs 410-424 scrambled, with  
469 all predicted TBX-37/38 sites mutated, and *TBX*<sub>418</sub> mutated. Expression driven by the proximal  
470 fragment with additional regions scrambled or with two predicted POP-1 sites mutated are  
471 displayed in Fig S11. (C-D) Anteriority scores (C) and Spearman's  $\rho$  (D) for the WT proximal  
472 fragment, with base pairs 410-424 scrambled, with all predicted TBX-37/38 sites mutated, and  
473 with *TBX*<sub>418</sub> mutated. Lineages used to determine anteriority scores are the same as in Fig 5J.  
474 Spearman's  $\rho$  analysis uses the full ABa lineage and was calculated relative to the mean expression  
475 of the WT -3.9 kb enhancer proximal fragment.  
476

477  
478 In this fragment there are five predicted TBX-37/38 sites, two of which are predicted to have high  
479 affinity for TBX-37 and TBX-38. Two of the sites overlap with either the 410-424 region that is  
480 essential for ABa-specific expression or the 425-449 region that is required for a subset of ABa-  
481 specific expression (Fig 7A, B; Fig S11A, B). To determine whether this region is bound by TBX-  
482 37 and TBX-38 *in vivo*, we mined a recently published dataset that measured genome-wide TBX-  
483 37 and TBX-38 binding by ChIP-seq. Both factors show binding in the proximal region of the -  
484 3.9 kb enhancer (Fig 5A) [50].

485  
486 To determine whether the TBX-37/38 sites are required for anterior expression, we measured the  
487 activity of the proximal fragment after mutating the two central nucleotides of all TBX-37/38 sites.  
488 The mutated enhancer fragment did not drive anterior-specific expression in the ABa lineage (Fig

489 7B, C, D; Fig S11B, C, D; Fig S12), confirming the importance of these sites. Additionally, the  
490 loss of anterior-biased expression following the mutation of these sites indicates that the two  
491 predicted high affinity POP-1 sites in this fragment are not sufficient to drive anterior-biased  
492 expression. Also, these sites are not necessary for the anterior-biased expression driven by this  
493 enhancer fragment, as the loss of these sites does not result in a loss of the anterior-biased  
494 expression (Fig S11B, C, D). In fact, concatemers of POP-1 sites are sufficient to drive posterior-  
495 biased expression (Fig S11F) [13,51].

496  
497 Since the high affinity site beginning at position 418 (*TBX<sub>418</sub>*) overlaps the region (410-424)  
498 required for expression, we hypothesized that this specific TBX-37/38 site may be required for  
499 anterior expression in the ABa lineage. To test this we tested the activity of the proximal fragment  
500 with only the central two nucleotides of *TBX<sub>418</sub>* mutated (Fig 7B, Fig S11B, E). This mutation  
501 resulted in a loss of robust anterior-biased expression driven by the proximal fragment. Therefore,  
502 TBX-37 and TBX-38 bind to the *ref-2* -3.9 kb enhancer proximal fragment and *TBX<sub>418</sub>* is necessary  
503 for it to drive robust anterior-biased expression (Fig 5A; Fig 7B, C, D; Fig S11B, C, D; Fig S12),  
504 suggesting that TBX-37 and TBX-38 directly regulate *ref-2* expression.

505  
506 **Concatemerized TBX sites are sufficient to drive anterior-specific expression in the ABa**  
507 **lineage**

508  
509 Given that *tbx-37* and *tbx-38* are expressed in both anterior and posterior cells within the ABa  
510 lineage, we hypothesized that site *TBX<sub>418</sub>* would be sufficient to drive broad expression in ABa,  
511 with other sequences in the enhancer required for anterior specificity. To test this, we tested the  
512 activity of synthetic enhancers comprising concatemerized copies of *TBX<sub>418</sub>* separated by either  
513 short (6-7 bp) or long (11-15 bp) flanking sequences from its endogenous context (Fig 8A).  
514 Surprisingly, both of these reporters drove anterior-specific expression in the ABa lineage similar  
515 to that driven by the full proximal fragment (Fig 8B, C, D). This indicates that either *TBX<sub>418</sub>* or its  
516 flanking sequences are sufficient both for ABa lineage expression, and for anterior-specific  
517 expression within this lineage. To test the possibility that the flanking sequences are responsible  
518 for anterior-specificity, we scrambled those sequences while leaving the central *TBX<sub>418</sub>* site intact  
519 in the context of the long-flanking-sequence construct. The resulting reporter was again expressed

520 only in anterior sublineages similar to the full proximal fragment (Fig 8A, B, C, D). Thus, when  
 521 multimerized, *TBX<sub>418</sub>* is sufficient both for ABa expression and for anterior specificity without  
 522 additional non-overlapping sequences.

523

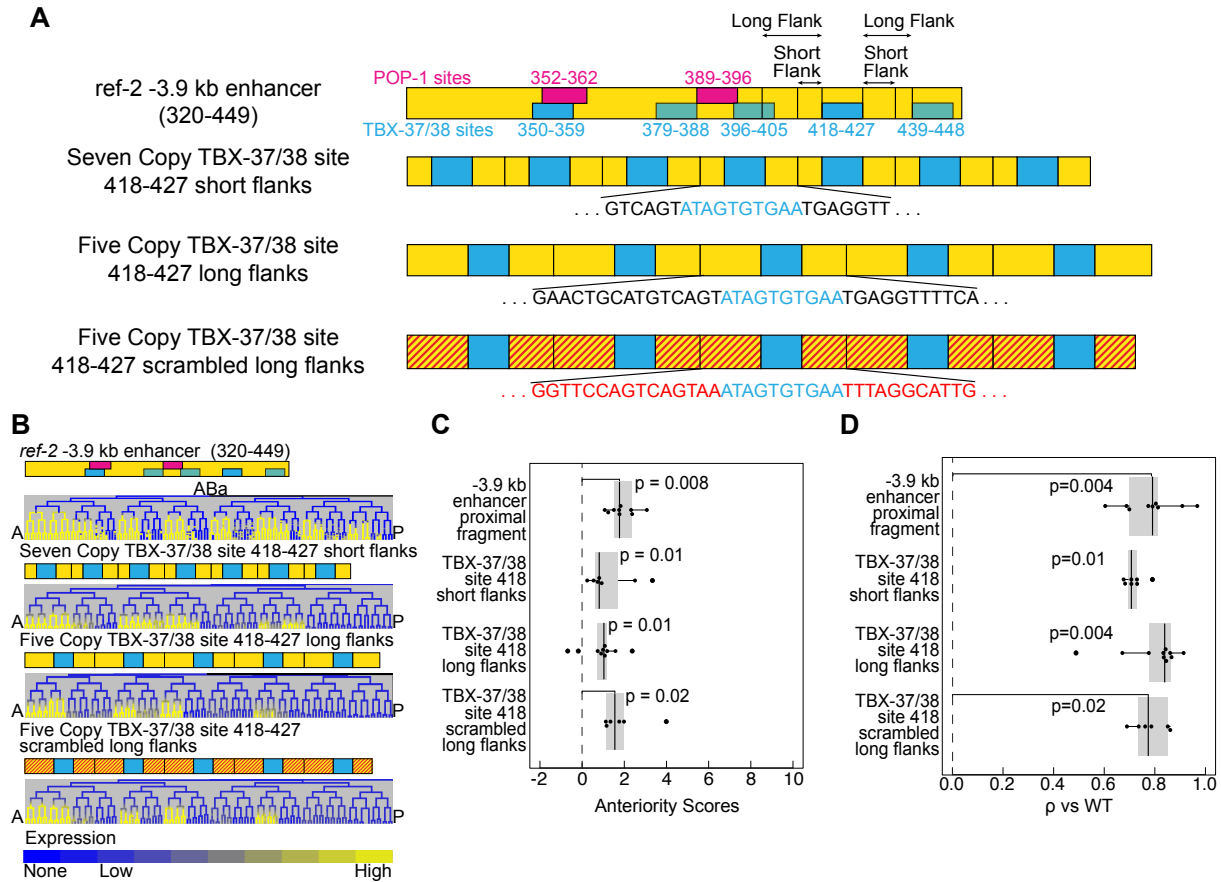

524

525

526 **Fig 8. *TBX<sub>418</sub>* in the *ref-2* -3.9 kb enhancer is sufficient when concatemerized to drive**  
 527 **anterior-biased expression in the ABa lineage.**

528 (A) Models of the proximal fragment of the *ref-2* -3.9 kb enhancer, the *TBX<sub>418</sub>* seven-site  
 529 concatemer with 6-7 base pair flanking regions, the *TBX<sub>418</sub>* five-site concatemer with 11-15  
 530 base pair flanking regions, and the *TBX<sub>418</sub>* five-site concatemer with 11-15 base pair  
 531 scrambled flanking regions. (B) Expression patterns driven by the proximal fragment of the *ref-2* -3.9 kb  
 532 enhancer and each *TBX-37/38* site concatemer. (C-D) Anteriority scores (C) and Spearman's  $\rho$  (D)  
 533 for the proximal fragment of the *ref-2* -3.9 kb enhancer and each *TBX-37/38* binding site concatemer.  
 534 Lineages used to determine anteriority scores are the same as in Fig 5J. Spearman's  $\rho$  analysis uses  
 535 the full ABa lineage expression pattern and was calculated relative to the WT proximal fragment.

536

537

538

## 539 DISCUSSION

540

541 Previous work has definitively shown that the Wnt pathway components POP-1 and SYS-1  
542 regulate posteriorly expressed genes in the *C. elegans* embryo via the canonical Wnt asymmetry  
543 pathway [12,13,35]. What has been less clear is how the similar number of anteriorly expressed  
544 genes are regulated. We have demonstrated that a set of anteriorly expressed genes, *tbx-35*, *ceh-*  
545 *51*, *elt-1*, *irx-1*, and *ref-2*, require POP-1 and SYS-1 for their anterior-biased expression. Therefore,  
546 POP-1 and SYS-1 regulate the expression of anterior-biased genes. The mechanism by which  
547 POP-1 and SYS-1 mediate this regulation remains to be determined. Previous work demonstrated  
548 that posterior genes can be regulated by POP-1 binding directly to POP-1 binding sites in their  
549 upstream regulatory regions [51]. Thus, a simple indirect model of POP-1 regulation of anterior  
550 genes would be POP-1 activating the expression of repressors in posterior cells. This mechanism  
551 would predict that anterior genes would be expressed later than posterior genes, or that anterior  
552 genes would be expressed early in both anterior and posterior cells, but maintained only in anterior  
553 cells. This can happen; for example, in the C lineage *elt-1* is expressed in both anterior and  
554 posterior sister cells at the 4C stage, but is only maintained in the anterior granddaughters of C  
555 (Caa and Cpa), perhaps due to its repression by the Wnt target *hlh-1* in the descendents of the  
556 posterior granddaughters of C (Cap and Cpp) [32]. What we observe in many cases, however, is  
557 that anterior gene expression is activated at about the same time as posterior gene expression in  
558 sister lineages. This observation suggests that POP-1 could regulate some anterior genes directly.  
559 Although some *pop-1* dependence of anterior genes could be explained by upstream anterior-to-  
560 posterior cell fate conversions following *pop-1* RNAi, our results as a whole cannot be explained  
561 by the known pattern of fate transformations [44].

562

563 Indirect *pop-1*-dependent regulation of anterior genes, however, does not explain all of its role in  
564 anterior gene expression regulation. For instance, previous work showed that loss of muscle-  
565 specifying TFs (MRFs) expressed in Cap and Cpp (*hlh-1*, *unc-120*, and *hnd-1*) is not sufficient to  
566 permit ectopic expression of *elt-1* in these cells or to convert them to an epidermal fate [32,54].  
567 Therefore, another factor, perhaps *pop-1* acting directly, must be responsible for restricting *elt-1*  
568 to the anterior C granddaughters. Our results identified a requirement for *pop-1* in anterior  
569 expression of *elt-1* but not posterior repression in the C lineage. The proposed role of the MRFs in

570 repressing *elt-1* expression [32,54,55] suggests that this effect could partly be due to misexpression  
571 of MRFs in the anterior C granddaughters, which could be tested in the future.

572

573 Direct activation of genes when Wnt is absent by POP-1/TCF, termed “opposite” Wnt target  
574 regulation, occurs in other systems. For example, in *Drosophila* TCF bound directly to DNA at  
575 non-optimal sites can activate transcription when unbound by  $\beta$ -catenin, and repress transcription  
576 when bound to  $\beta$ -catenin. This difference in the regulatory activity of TCF is mediated by an  
577 allosteric conformational change in the structure of TCF [22]. In *C. elegans*, POP-1 bound together  
578 with REF-2 at the *ttx-3* cis-regulatory region, may similarly undergo allosteric changes, leading to  
579 opposite target regulation [20,21]. Our findings are consistent with a similar mechanism regulating  
580 *ref-2* itself.

581

582 Our observation that five copies of a single 10 base-pair TBX-37/38 binding site are sufficient to  
583 drive anterior-biased expression in the ABa lineage suggests that a POP-1 site is likely unnecessary  
584 for anterior expression. However, *tbx-37* and *tbx-38* cannot explain this anterior bias alone, as  
585 these factors are expressed throughout the ABa lineage. We showed that *pop-1* is required for both  
586 anterior expression and posterior repression of the *ref-2* promoter. If this role of POP-1 is direct,  
587 it likely acts by binding to other factors such as TBX-37 and TBX-38, rather than to DNA directly.  
588 Consistent with this, TBX-38 and POP-1 were previously found to physically interact with each  
589 other [56]. Intriguingly, several other T-box factors are expressed early in the AB lineage [50,57];  
590 future work should determine if these play a role in restricting the activity of these sites to anterior  
591 lineages. For instance, *TBX<sub>418</sub>* is predicted to be bound by several other *C. elegans* T-box factors.  
592 Other T-box factors expressed in the early ABa lineage could compete for binding at this site, with  
593 POP-1 altering the relative activity of these factors between anterior and posterior cells.  
594 Additionally, it is unclear whether *tbx-37* and *tbx-38* also regulate posterior gene expression in the  
595 ABa lineage; intriguingly, the expression of *pha-4*, another anterior gene, in the ABa lineage is  
596 also dependent on *tbx-37* and *tbx-38* [44].

597

598 In contrast with our observation that *TBX<sub>418</sub>* concatemers are sufficient to drive anterior-biased  
599 expression, Murgan et al. 2015 found that a REF-2 binding site concatemer is not sufficient to  
600 drive expression in the anterior AIY mother cell. Instead, Murgan et al. identified binding sites for

601 helix-loop-helix family transcription factors that are sufficient to drive anterior expression in the  
602 AIY mother and its posterior sister cell, and that combining these with REF-2 binding sites restricts  
603 expression to the AIY mother. Thus, REF-2 acting through ZIC binding sites is not sufficient to  
604 activate expression without cooperating factors binding other sites whereas TBX-37 and TBX-38  
605 may be sufficient to do so. Other factors could also play a role, for example we used a pes-10  
606 minimal promoter, whereas Murgan et al. did not include a minimal promoter in their constructs,  
607 and there could be differences in sensitivity between the microscopy techniques.

608  
609 Classic work in many species, including flies and vertebrates, has found that developmental genes  
610 are often regulated both by partially redundant enhancers and modular enhancers that are  
611 responsible for regulating distinct portions of the genes' expression patterns [58,59]. The extent to  
612 which *C. elegans* genes are regulated by such distal enhancers vs promoter proximal elements has  
613 been unclear. We found that the predicted enhancers in the promoter region of *ref-2* function  
614 modularly, such that each enhancer drives different expression patterns, presumably providing  
615 multiple inputs to fine-tune the expression pattern of *ref-2*. Combined with other recent studies  
616 this adds to evidence that enhancer-mediated regulation is widespread during *C. elegans*  
617 embryonic development [52,60–64]. Additionally, we observe modularity within the -3.9 kb  
618 enhancer, with three non-overlapping regions of the enhancer each sufficient to drive anterior-  
619 biased expression. Since the protein reporter is expressed in more lineages than the promoter  
620 reporter, there are likely even more enhancers outside the promoter region that regulate expression  
621 of *ref-2*.

622  
623 Several studies have identified evidence for multiple functions of *ref-2*. *ref-2* was first identified  
624 as being required for the production of the Pn.p ventral epidermal cells and for the inhibition of  
625 their fusion to the epidermal syncytium hyp7 [38]. *ref-2* is also required for the initiation of the  
626 differentiation of the cholinergic neuron AIY [65]. Also, *ref-2* has been found to be required for  
627 female fate during sexual development [66]. We have demonstrated a role for *ref-2* in embryonic  
628 development. *ref-2* is required for robust WT cell positioning and cell division timing in anterior  
629 lineages. Intriguingly, an insect ortholog of *ref-2*, *odd-paired*, acts as a regulator of anterior-  
630 posterior expression and is an anterior determinant in several species [67,68], suggesting the  
631 function of *ref-2* in anterior fate regulation may be ancestral. Because the defects in cell position



632 and division timing are only partially penetrant, there are likely other, partially redundant  
633 regulators of cell position and cell division timing that act with the sole *C. elegans* ZIC homolog  
634 *ref-2* during embryonic development. Further experiments, including suppressor and enhancer  
635 screens and co-mutation of other transcription factors will need to be performed to identify other  
636 factors that regulate cell position and division timing in conjunction with *ref-2*.

637

## 638 **METHODS**

639

### 640 ***C. elegans* culture and strain generation**

641

642 *C. elegans* strains (Table S1) were maintained at standard growth temperatures on OP50 *E. coli*  
643 on NGM plates (Table S2). RNAi knockdown was performed by feeding, as previously described  
644 [69,70]. We validated the efficacy of *pop-1* RNAi by measuring the cell cycle delay resulting from  
645 the transformation of the anterior MS lineage into an E-like lineage, and we validated the efficacy  
646 of *sys-1* RNAi by failure of morphogenesis and embryonic death (Table S2) [13,33]. Enhancer  
647 reporter strains were generated by microinjection into RW10029, the GFP histone strain used for  
648 lineage tracing. Injection cocktails consisted of reporter DNA construct at 10 ng/μL, with 5 ng/μL  
649 *myo-2p::GFP*, and 135 ng/μL pBluescript vector (or highest concentration possible whenever 135  
650 ng/μL was impossible to make) and were injected using a Narishige MN-151 micromanipulator  
651 with Tritech microinjector system. Other strains were created through crosses using standard  
652 approaches (Table S1).

653

### 654 **Generation of transgenes**

655

656 Candidate enhancers were amplified by PCR from *C. elegans* N2 strain genomic DNA with  
657 Phusion HF polymerase (New England Biosciences) and gel purified (Qiagen). Enhancer  
658 fragments, mutated enhancers, and binding site concatemers were ordered as either gBlocks or  
659 Ultramers from Integrated DNA Technologies (Coralville, Iowa) and were amplified with Phusion  
660 HF polymerase (New England Biosciences) with overhangs for stitching and either gel or PCR  
661 purified (Qiagen). Enhancer reporters were produced by fusing via PCR stitching these constructs  
662 to a *pes-10* minimal promoter::*HIS-24*::mCherry::*let-858* 3'UTR fragment amplified from the

663 POPTOP plasmid [51] (Addgene #34848). The enhancer reporters were purified with a PureLink  
664 PCR purification kit (ThermoFisher) and/or gel purified. The desired product was determined by  
665 its size based on gel electrophoresis. We identified putative transcription factor binding sites using  
666 CIS-BP (<http://cisbp.cabr.utoronto.ca>) [71,72]. To mutate the TBX-37/38 sites, the central two  
667 nucleotides were altered (eg. ATAGTGTGAA changed to ATAGGTTGAA for *TBX<sub>418</sub>*). For the  
668 construct with all TBX-37/38 sites mutated, after mutating the five primary sites, subsequent  
669 analysis revealed two weaker sites. All of these predicted TBX-37/38 sites were mutated. The  
670 reporter construct for the *ref-2* promoter lacking the -3.9 kb enhancer was amplified from N2  
671 genomic DNA by PCR and PCR stitched to the *pes-10* minimal promoter::HIS-24::mCherry  
672 reporter, and, thus, drives expression through the *pes-10* minimal promoter. The *pes-10* promoter  
673 drives no consistent embryonic expression on its own prior to elongation [13,51,52] and is  
674 compatible with a wide variety of enhancers [13,51] (Table S5).

675

## 676 **Quantitative comparisons**

677

678 All quantitative comparisons were performed using R version 4.0.3 (The R Foundation for  
679 Statistical Computing), Microsoft Excel version 16.16.27, or Python version 2.7.16. For the main  
680 figures, a minimum N of 6 was used for all experiments, except for ELT-1::GFP expression after  
681 *sys-1* RNAi, for which N = 3. For the supplemental figures, a minimum N of 2 was used (largely  
682 for perturbations which appeared similar to wild-type at this level). Code and raw data for these  
683 analyses are available at [https://github.com/jisaacmurray/ref-2\\_paper](https://github.com/jisaacmurray/ref-2_paper).

684

## 685 *Expression and phenotypic analysis by 4D imaging*

686

687 We obtained confocal micrographs using a Leica TCS SP5 or Stellaris scanning confocal  
688 microscope (67 z planes at 0.5  $\mu$ m spacing and 1.5 minute time spacing, with laser power  
689 increasing by 4-fold through the embryo depth to account for attenuation of signal with depth).  
690 Embryos obtained from self-fertilized hermaphrodites were mounted in egg buffer/methyl  
691 cellulose with 20 $\mu$ m beads used as spacers and imaged at 22°C using a stage temperature controller  
692 (Brook Industries, Lake Villa, IL) [73]. We used StarryNite software to automatically annotate  
693 nuclei and trace lineages [29]. We corrected errors from the automated analysis and quantified

694 reporter expression in each nucleus relative to the local background (using the “blot” background  
695 correction technique) with AceTree software as previously described (Table S3) [24,26].

696

#### 697 *Anterior gene WT to RNAi within lineage comparisons*

698

699 To compare the expression levels of the anterior genes *tbx-35*, *ceh-51*, *ELT-1*, *irx-1*, and *ref-2*  
700 between WT and RNAi embryos within the expressing lineages and their posterior sisters, we  
701 calculated for each embryo the mean reporter expression across all measurements within each  
702 lineage (all descendant cells and time points) starting with the cell stage that expresses the reporter  
703 at the time cells are born or shortly afterwards to the last time point in the indicated lineage. The  
704 expression analyzed for the MS lineage starts at an earlier stage than that for other lineages, since  
705 following *pop-1* RNAi the cell divisions are so dramatically delayed that reporter expression  
706 comes on in earlier cell generations in these embryos. The cell generations used in each of these  
707 comparisons are noted in Table S4.

708

#### 709 *Anteriority Scores*

710

711 To measure the magnitude of anterior expression bias, we developed a measure that we refer to as  
712 the anteriority score. To determine the anteriority scores, first we chose a minimum expression  
713 cutoff and set all values below this cutoff to 0 and subtracted the minimum cutoff from all  
714 expression values greater than or equal to the cutoff (an expression value of 200 was used as the  
715 cutoff for all anteriority score analyses, except a value of zero was used for the TBX-38::GFP  
716 reporter, which has very low fluorescence intensity compared to the other reporters analyzed).  
717 Next, we averaged the expression levels of the reporter of interest in the cells of each anterior and  
718 each posterior sister lineage of interest. For the *ref-2* promoter and enhancer constructs, as well as  
719 the TBX-37/38 site concatemers, we analyzed anterior and posterior lineages descended from the  
720 cells ABala, ABalaa, ABalap, ABalpa ABalpp ABaraa, ABarap, ABarpa, and ABarpp. We used  
721 expression values starting at the generation with ABxxxxxx cells (AB128 stage) until the time  
722 point of the last division of AB128 stage cells in the ABa lineage. Next, we calculated the means  
723 of the average expression levels of all of the anterior lineages and all of the posterior lineages  
724 analyzed for each embryo. We then added a pseudocount of 1 to each of the anterior and posterior

725 embryo means. For each experimental group, the adjusted average anterior expression is divided  
726 by the adjusted average posterior expression, and the base 2 logarithm of the result is reported--  
727 Anteriority Score =  $\log_2((\text{anterior mean} + 1)/(\text{posterior mean} + 1))$ .

728

#### 729 *Correlation analysis*

730

731 Correlation analysis was done by Spearman's  $\rho$ , comparing each embryo's expression to the  
732 average expression of the control group. Spearman's  $\rho$  was calculated in R using the "cor"  
733 function. For Spearman's  $\rho$  we used all the data from the lineages of interest without excluding  
734 any cell generations or having a minimum value cutoff. We included cells born before the onset  
735 of expression here to include information about the cell generation of expression onset in the  
736 analysis. For the analysis comparing the *ref-2* promoter with its enhancers we used the full somatic  
737 lineage starting with the blastomeres AB, EMS, C, and D. For all other analyses we used only the  
738 ABa lineage.

739

#### 740 *Mutant cell position and cell division analysis*

741

742 We identified cell position and cell cycle defects as previously described [39]. We corrected for  
743 differences in global division rates, and considered divisions as defective if they deviated from the  
744 wild-type cell cycle length by at least five minutes and had a z-score greater than three. Cell  
745 positions were corrected for differences in embryo size and rotation, and considered defective if  
746 they deviated from the expected wild type position by at least five microns, had a z-score greater  
747 than five, and a nearest neighbor score greater than 0.8.

748

#### 749 *Statistical analyses*

750

751 Statistical significance of differences in anterior or posterior expression between untreated and  
752 RNAi-treated embryos was tested using the two-tailed Wilcoxon Ranked Sum test. Statistical  
753 significance of differences in Spearman's  $\rho$  or Anteriority Score were tested using the one-tailed  
754 Wilcoxon Ranked Sum test to test for differences from either the control group or from 0, as  
755 indicated in each figure. The p-values calculated by the Wilcoxon Ranked Sum test were corrected

756 for multiple comparisons using the false discovery rate method in R. Significance of overlap  
757 between positional or cell division defects and expression status were assessed using a Chi-squared  
758 test.  
759  
760

761 **FIGURES**

762

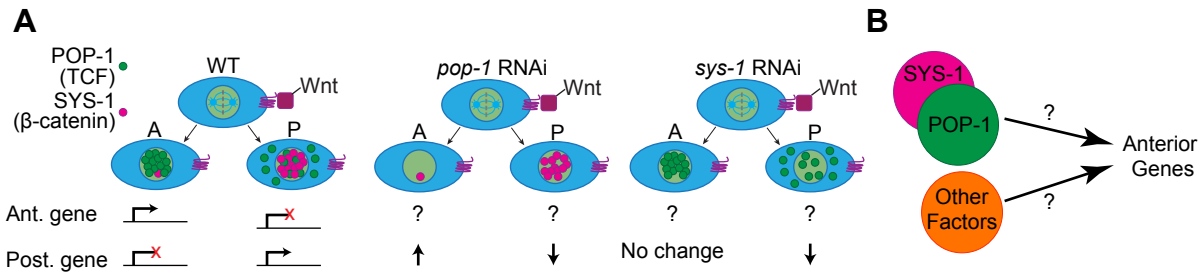

763

764

765 **Fig 1. How are anterior genes regulated?**

766 (A) The Wnt/β-catenin asymmetry pathway regulates anterior-posterior patterning by producing  
767 asymmetric nuclear concentrations of POP-1/TCF and SYS-1/β-catenin in anterior and posterior  
768 sister cells. Low nuclear concentrations of POP-1 and high nuclear concentrations of SYS-1 in the  
769 posterior cell activate expression of posterior genes and are associated with the lack of expression  
770 of anterior genes. Conversely, high nuclear concentrations of POP-1 and low nuclear  
771 concentrations of SYS-1 in the anterior cell repress posterior genes and are associated with  
772 expression of anterior genes. Effects of *pop-1* and *sys-1* RNAi on posterior genes are shown;  
773 effects on most anterior genes are unknown. (B) In this work, we test whether *pop-1*/TCF and *sys-1*-  
774 /β-catenin regulate anterior genes in the *C. elegans* embryo, and ask what other factors also  
775 regulate anterior expression.

776

777

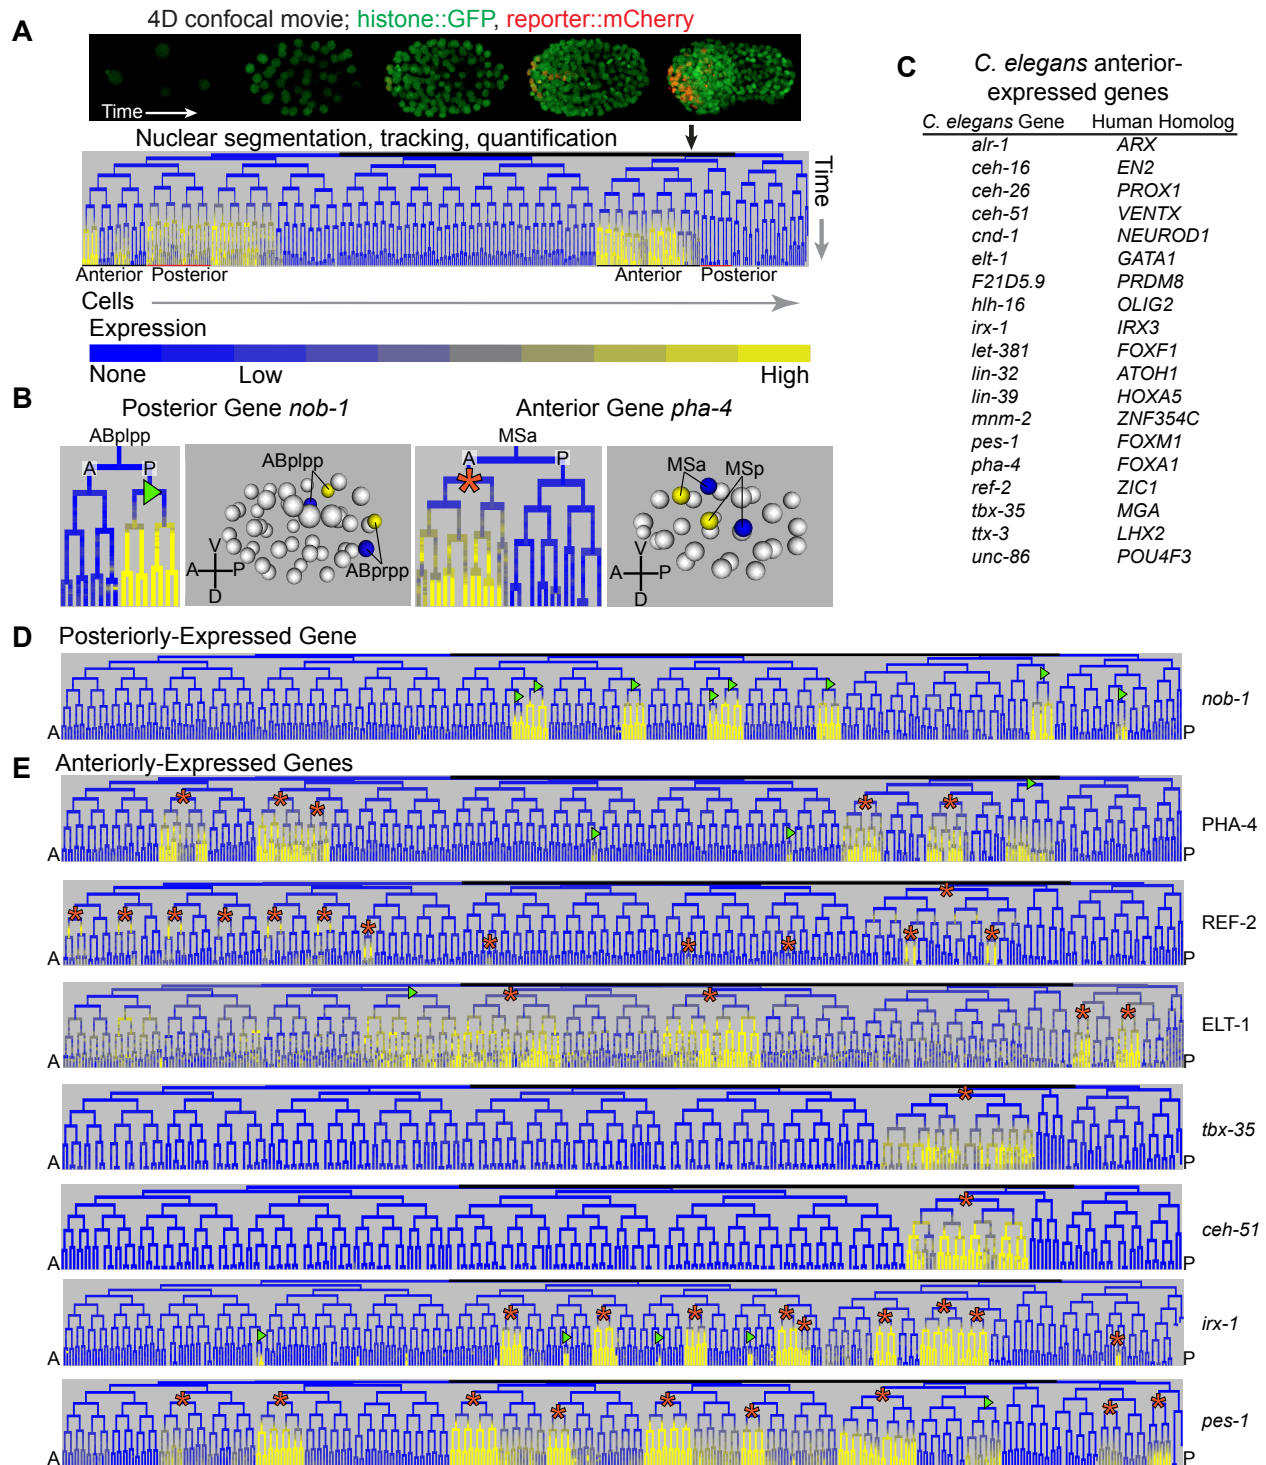

778  
779

780 **Fig 2. Identification of genes with anterior-biased expression.**

781 (A) Automated lineaging traces lineages and quantifies expression from 4D confocal movies. In  
782 the lineage trees, vertical lines represent cells, and horizontal lines represent cell divisions. Most  
783 cells divide along the anterior-posterior axis, with anterior cells depicted on the left branch and  
784 posterior cells on the right branch. (B) Posterior and anterior genes are denoted as such based on  
785 their expression in cells descended from either a posterior or anterior sister cell, respectively,

786 following an anterior-posterior cell division. Anterior and posterior genes can generally be  
787 expressed in cells from any part of the embryo. Anterior and posterior founder cells are labeled  
788 with orange asterisks/green triangles respectively. (C) List of anterior-biased genes in the EPiC  
789 database along with their predicted human homologs. (D) Expression pattern of a posterior gene,  
790 *nob-1/Hox9-13*. (E) Expression patterns of several anterior genes; most are expressed in unique  
791 combinations of mostly anterior lineages.  
792  
793



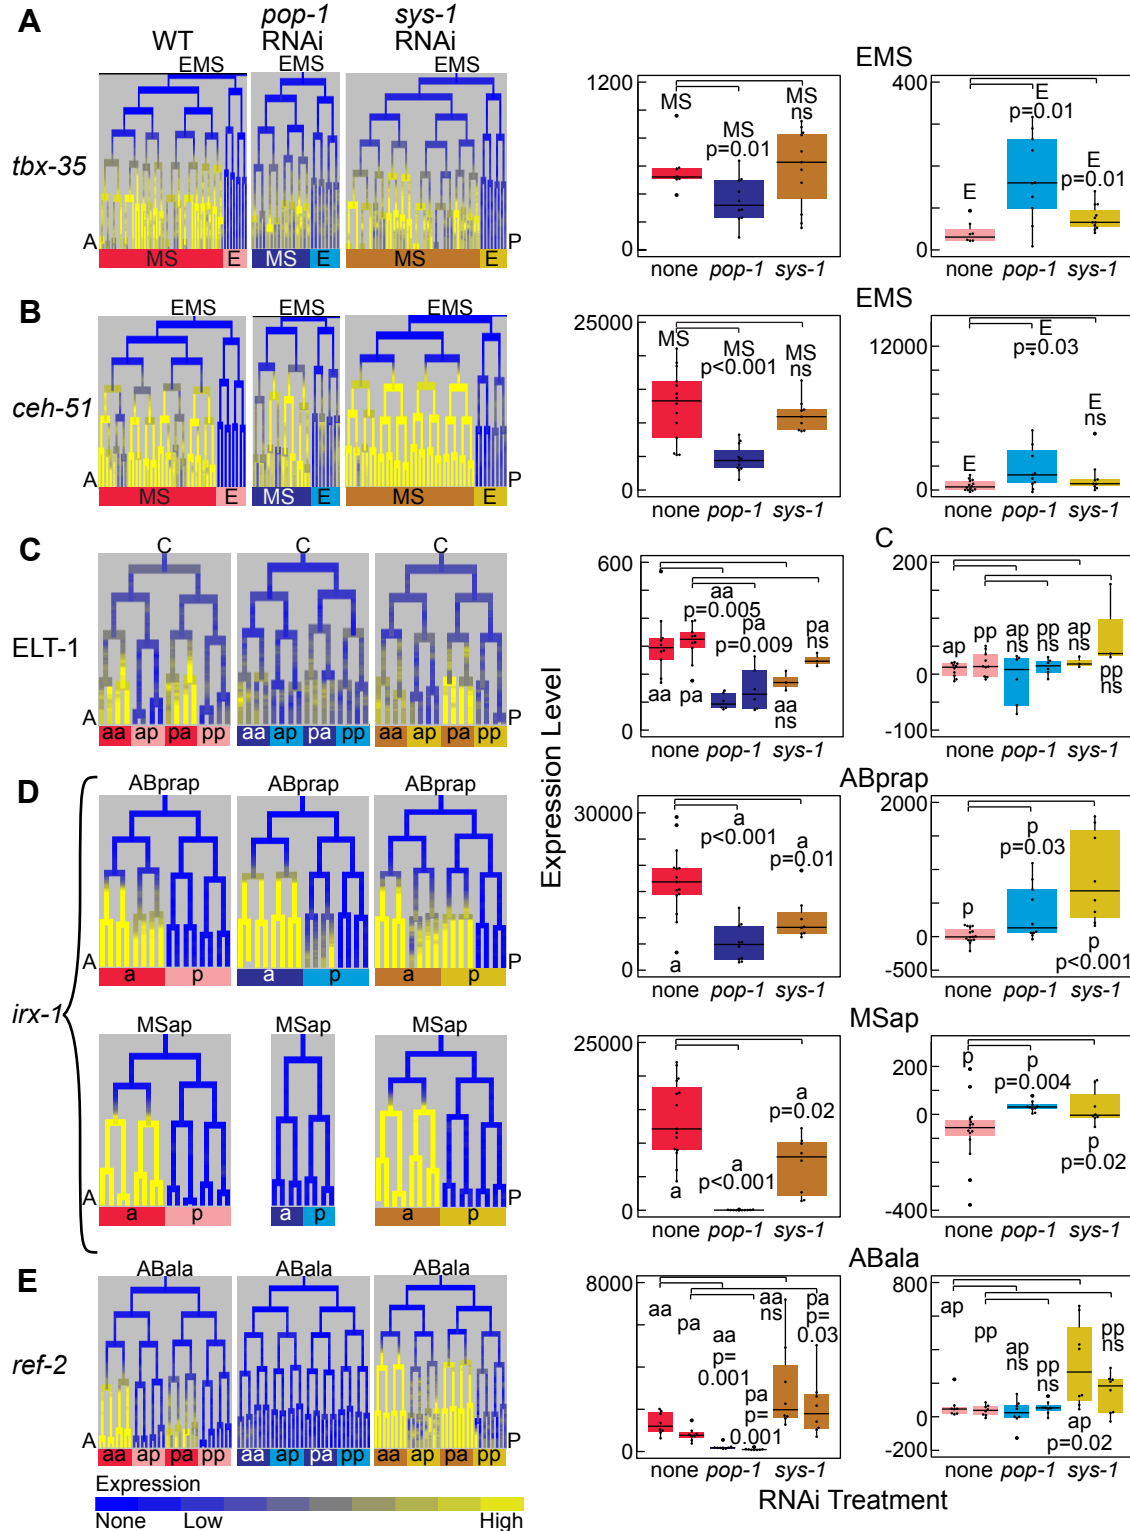

794  
795

796 **Fig 3. Regulation of anterior genes by Wnt effectors *pop-1* and *sys-1*.**

797 (A-E) Expression pattern (left) and quantification (right) of reporters for the anterior genes *tbx-35*  
798 (A), *ceh-51* (B), ELT-1 (C), *irx-1* (D), and *ref-2* (E) in specific anterior lineages and their posterior  
799 sisters. Expression is shown under WT conditions and following *pop-1* or *sys-1* RNAi. Expression

800 quantification (right) is the mean expression across all measurements within that lineage from  
801 when the reporter is normally first detected until the last time point indicated in the lineage (details  
802 in Methods).  
803  
804

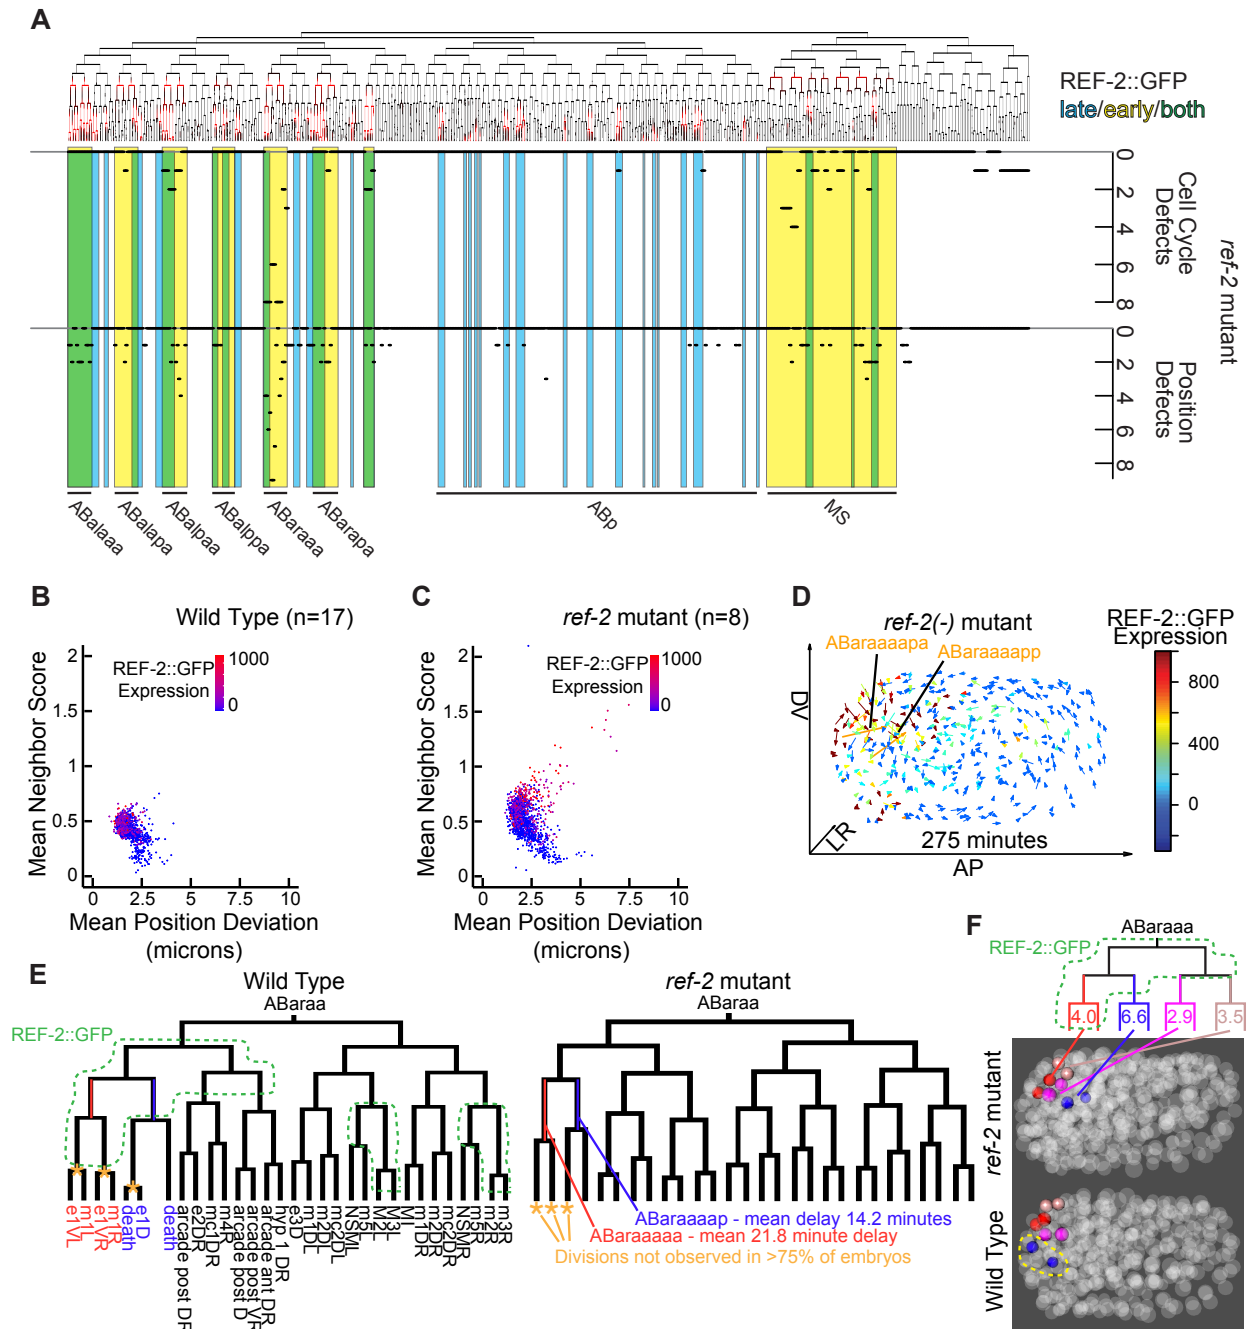

805  
806

807 **Fig 4. *ref-2* is required for proper division timing and positioning for many embryonic cells**  
808 **that are descended from cells that express *ref-2*.**

809 (A) Lineage tree depicting the REF-2 protein expression pattern (top), and chart indicating the  
810 number of embryos out of eight homozygous *ref-2* mutant embryos that exhibit cell cycle defects  
811 and position defects in indicated cell lineages. Yellow indicates lineages that express *ref-2* early,  
812 blue indicates lineages that express *ref-2* late, and the overlap (green) indicates both. A  
813 corresponding analysis of wild-type embryos gives 0-1 defects per cell in all of 17 embryos tested  
814 [39]. (B-C) Scatter plot of mean neighbor score vs mean position deviation of cells of 17 wild-type  
815 (B) and eight *ref-2* mutant (C) embryos. Neighbor score is the ratio of each cell's distances to its

816 ten closest wild-type neighbors between mutant and wild-type embryos. Points representing cells  
817 are colored based on WT REF-2::GFP expression levels [39]. (D) Plot of cell position deviations  
818 with arrows starting at the average WT position of cells and pointing to the average position in *ref-*  
819 *2* mutants. Arrows are colored by the WT expression levels of REF-2::GFP for each cell. The  
820 labeled cells (ABaaaaapa and ABaaaaapp) have the greatest mean cell position deviations. (E)  
821 ABaaaa lineages of WT and *ref-2* mutant embryos, with cells expressing REF-2::GFP outlined on  
822 the WT tree. Two delayed and three missed cell divisions are highlighted on the *ref-2* mutant tree.  
823 (F) ABaaaa lineage with cells expressing REF-2::GFP outlined. The average position deviations  
824 in microns of terminal sister cells are indicated on the terminal branches of the lineage tree. Three  
825 dimensional projections of a WT and a *ref-2* mutant embryo are shown with the positions of the  
826 terminal ABaaaa lineage cells highlighted. ABaaaaapa and ABaaaaapp are outlined in the WT  
827 embryo projection as the cells with the greatest mean position deviation in the *ref-2* mutant.  
828  
829

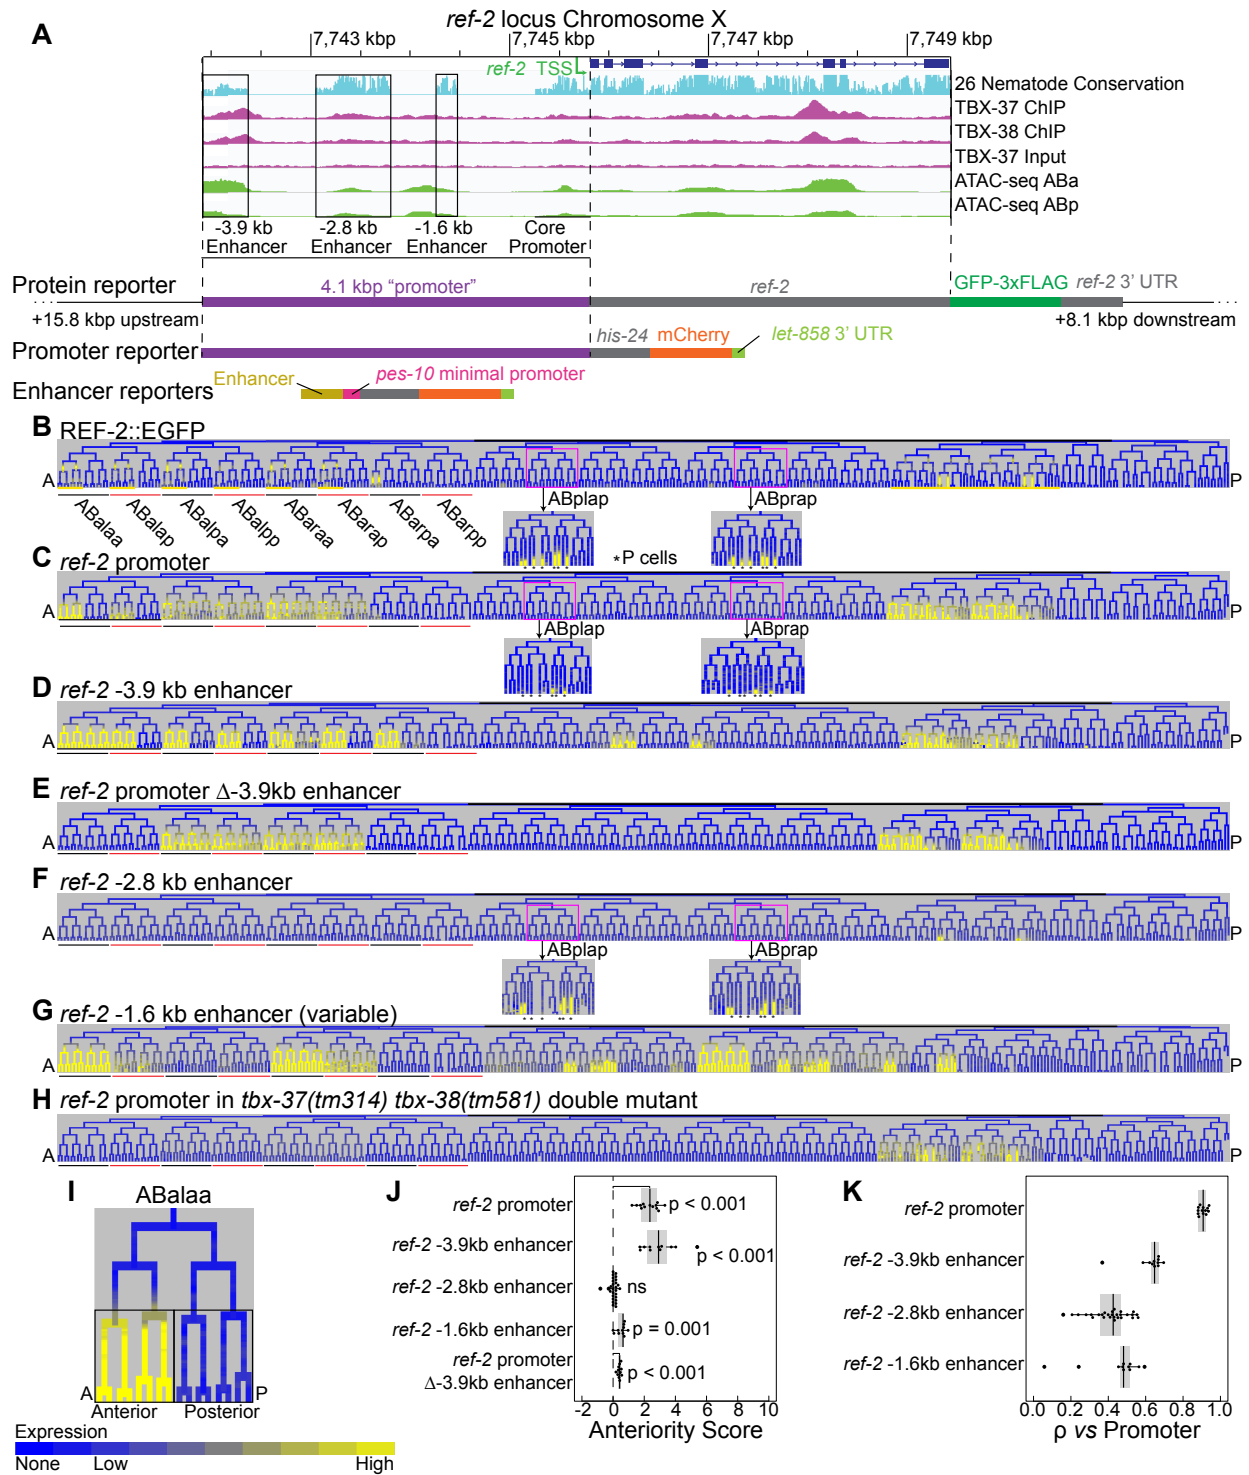

830  
831

832 **Fig 5. Identification of *ref-2* enhancers.**

833 (A) Genome browser screenshot showing the *ref-2* locus on the X chromosome. Displayed tracks  
834 include the gene model, sequence conservation among 26 *Caenorhabditis* species [49], ChIP-seq  
835 data for TBX-37 and TBX-38 binding, and ATAC-seq data for cells in the ABa and ABp lineages  
836 [50]. Boxes indicate candidate enhancer regions as determined by conservation. Below the genome  
837 browser screenshot are models of the fluorescent reporter expression constructs we examined. (B-

838 H) Lineage trees showing the expression patterns of *ref-2* protein (B), promoter (C), -3.9 kb  
839 enhancer reporter (D), promoter lacking the -3.9 kb enhancer (E), -2.8 kb enhancer reporter (F), -  
840 1.6 kb enhancer reporter (G), and promoter in the *tbx-37 tbx-38* double mutant (H) as determined  
841 by time-lapse confocal microscopy. Sublineages used in anteriority analyses are labeled in B and  
842 underlined in black (anterior) and red (posterior) under each lineage tree. Sublineages with  
843 transient early REF-2::EGFP (protein reporter) expression are underlined in yellow under the  
844 lineage tree in B. Pn ventral epidermal cells are indicated with asterisks in insets of panels B, C,  
845 and F. (I) Example lineage showing which cells were included in anteriority score analyses.  
846 Reporter expression levels were averaged across cells in the anterior or posterior lineages for the  
847 indicated cell generations. (J) Anteriority scores of the *ref-2* promoter, enhancers, and promoter  
848 lacking the -3.9 kb enhancer. Lineages used for analysis are ABala, ABalaa, ABalap, ABalpa,  
849 ABalpp, ABaraa, ABarap, ABarpa, and ABarpp (see Fig 5B). (K) Full somatic lineage correlation  
850 (Spearman's  $\rho$ ) of each reporter's expression pattern with the mean expression pattern across  
851 embryos expressing the promoter reporter.  
852  
853

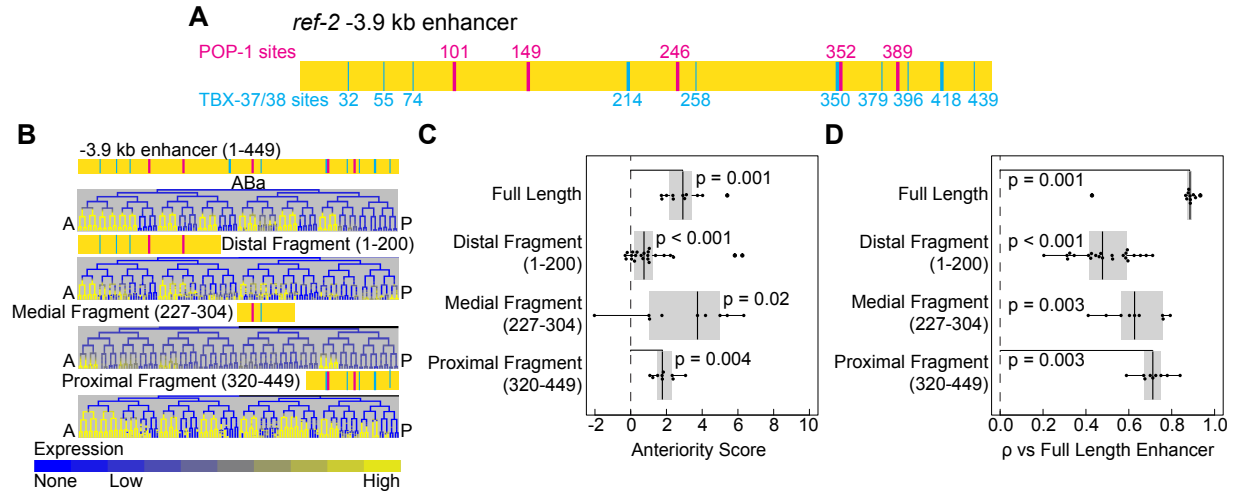

854

855

856 **Fig 6. Three non-overlapping fragments of the -3.9 kb enhancer are each sufficient to drive**

857 **anterior-biased expression in the ABA lineage of the early embryo.**

858 (A) Model of the *ref-2* -3.9 kb enhancer with predicted TBX-37/38 sites (cyan, predicted high

859 affinity sites indicated by thick line and predicted low-affinity by a thin line), and predicted high

860 affinity POP-1 sites (magenta). (B) Expression patterns driven by full-length *ref-2* -3.9 kb enhancer

861 and by minimal fragments. (C-D) Box plots displaying the anteriority scores (C) and Spearman's

862  $\rho$  (D) for the full-length *ref-2* -3.9 kb enhancer and minimal fragments. Lineages used to determine

863 anteriority scores are the same as in Fig 5J. Spearman's  $\rho$  analysis uses the full ABA lineage and

864 was calculated relative to the mean expression of the full-length -3.9 kb enhancer. A complete set

865 of enhancer truncations tested is displayed in Fig S10.

866

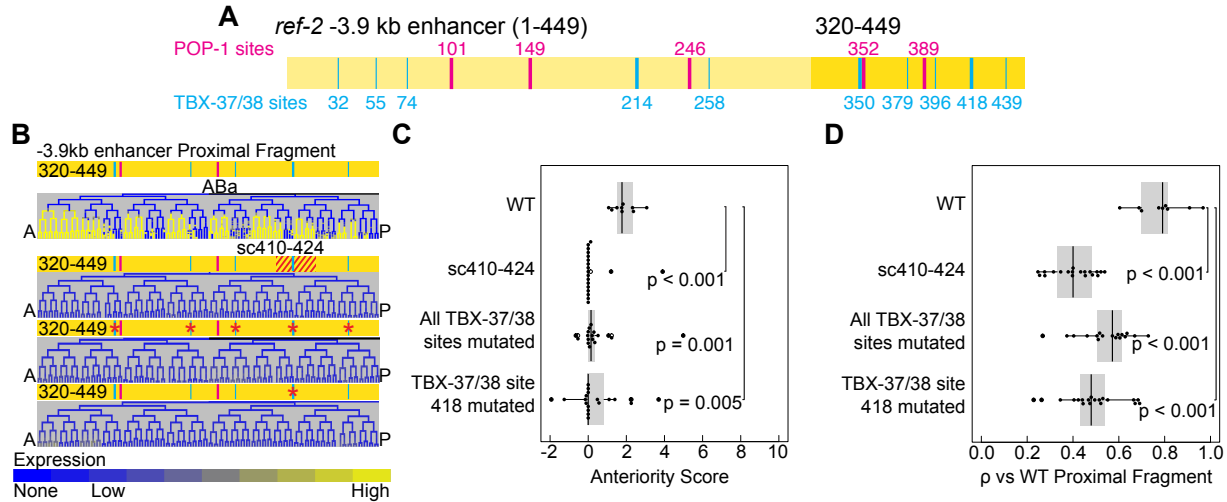

867  
868

869 **Fig 7. The ABa-expressed transcription factors *tbx-37* and *tbx-38* are required for the**  
870 **anterior-biased expression of *ref-2* in the ABa lineage.**

871 (A) Model of the *ref-2* -3.9 kb enhancer with proximal fragment (base pairs 320-449) highlighted.  
872 Predicted TBX-37/38 and POP-1 sites are indicated as in Fig 6. (B) Expression patterns driven by  
873 the WT proximal fragment of the *ref-2* -3.9 kb enhancer, with base pairs 410-424 scrambled, with  
874 all predicted TBX-37/38 sites mutated, and *TBX*<sub>418</sub> mutated. Expression driven by the proximal  
875 fragment with additional regions scrambled or with two predicted POP-1 sites mutated are  
876 displayed in Fig S11. (C-D) Anteriority scores (C) and Spearman's  $\rho$  (D) for the WT proximal  
877 fragment, with base pairs 410-424 scrambled, with all predicted TBX-37/38 sites mutated, and  
878 with *TBX*<sub>418</sub> mutated. Lineages used to determine anteriority scores are the same as in Fig 5J.  
879 Spearman's  $\rho$  analysis uses the full ABa lineage and was calculated relative to the mean expression  
880 of the WT -3.9 kb enhancer proximal fragment.  
881



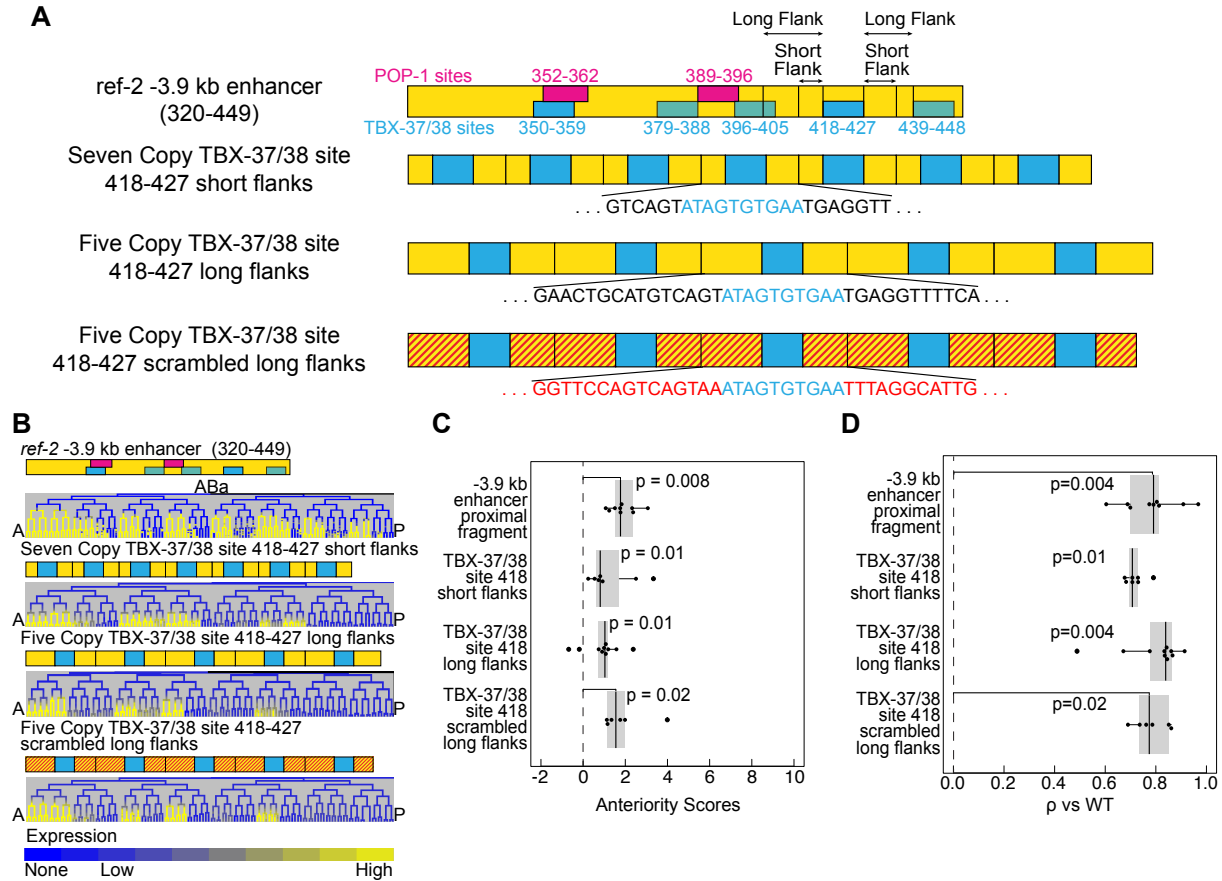

882  
 883

884 **Fig 8. *TBX*<sub>418</sub> in the *ref-2* -3.9 kb enhancer is sufficient when concatemered to drive**  
 885 **anterior-biased expression in the ABA lineage.**

886 (A) Models of the proximal fragment of the *ref-2* -3.9 kb enhancer, the *TBX*<sub>418</sub> seven-site  
 887 concatemer with 6-7 base pair flanking regions, the *TBX*<sub>418</sub> five-site concatemer with 11-15  
 888 base pair flanking regions, and the *TBX*<sub>418</sub> five-site concatemer with 11-15 base pair scrambled  
 889 flanking regions. (B) Expression patterns driven by the proximal fragment of the *ref-2* -3.9 kb enhancer and  
 890 each *TBX*-37/38 site concatemer. (C-D) Anteriority scores (C) and Spearman's  $\rho$  (D) for the  
 891 proximal fragment of the *ref-2* -3.9 kb enhancer and each *TBX*-37/38 binding site concatemer.  
 892 Lineages used to determine anteriority scores are the same as in Fig 5J. Spearman's  $\rho$  analysis uses  
 893 the full ABA lineage expression pattern and was calculated relative to the WT proximal fragment.  
 894

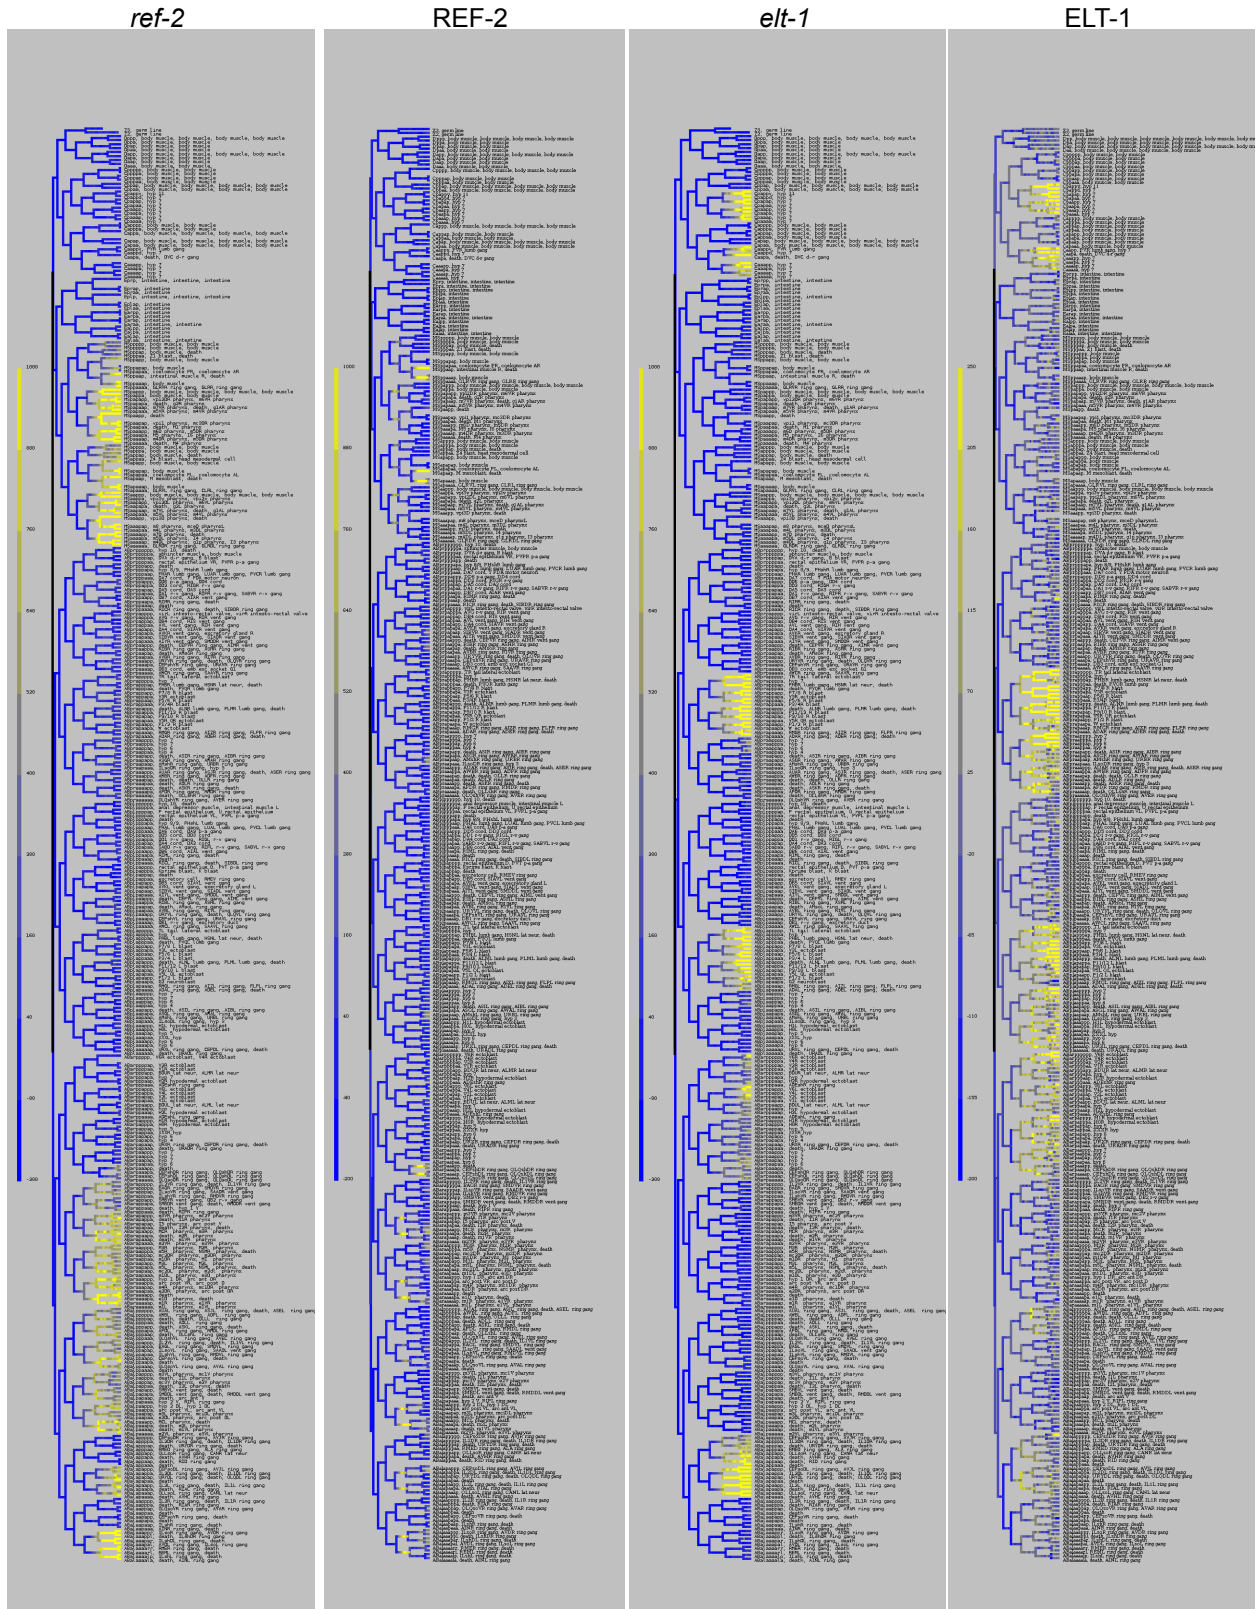

895  
896  
897

898 **Fig S1. Several early embryonic genes are expressed with anterior bias.**

899 Full lineage expression patterns are shown for integrated transgenic promoter reporters of *ref-2*  
900 and *elt-1*; and for integrated transgenic protein reporters of REF-2 and ELT-1.

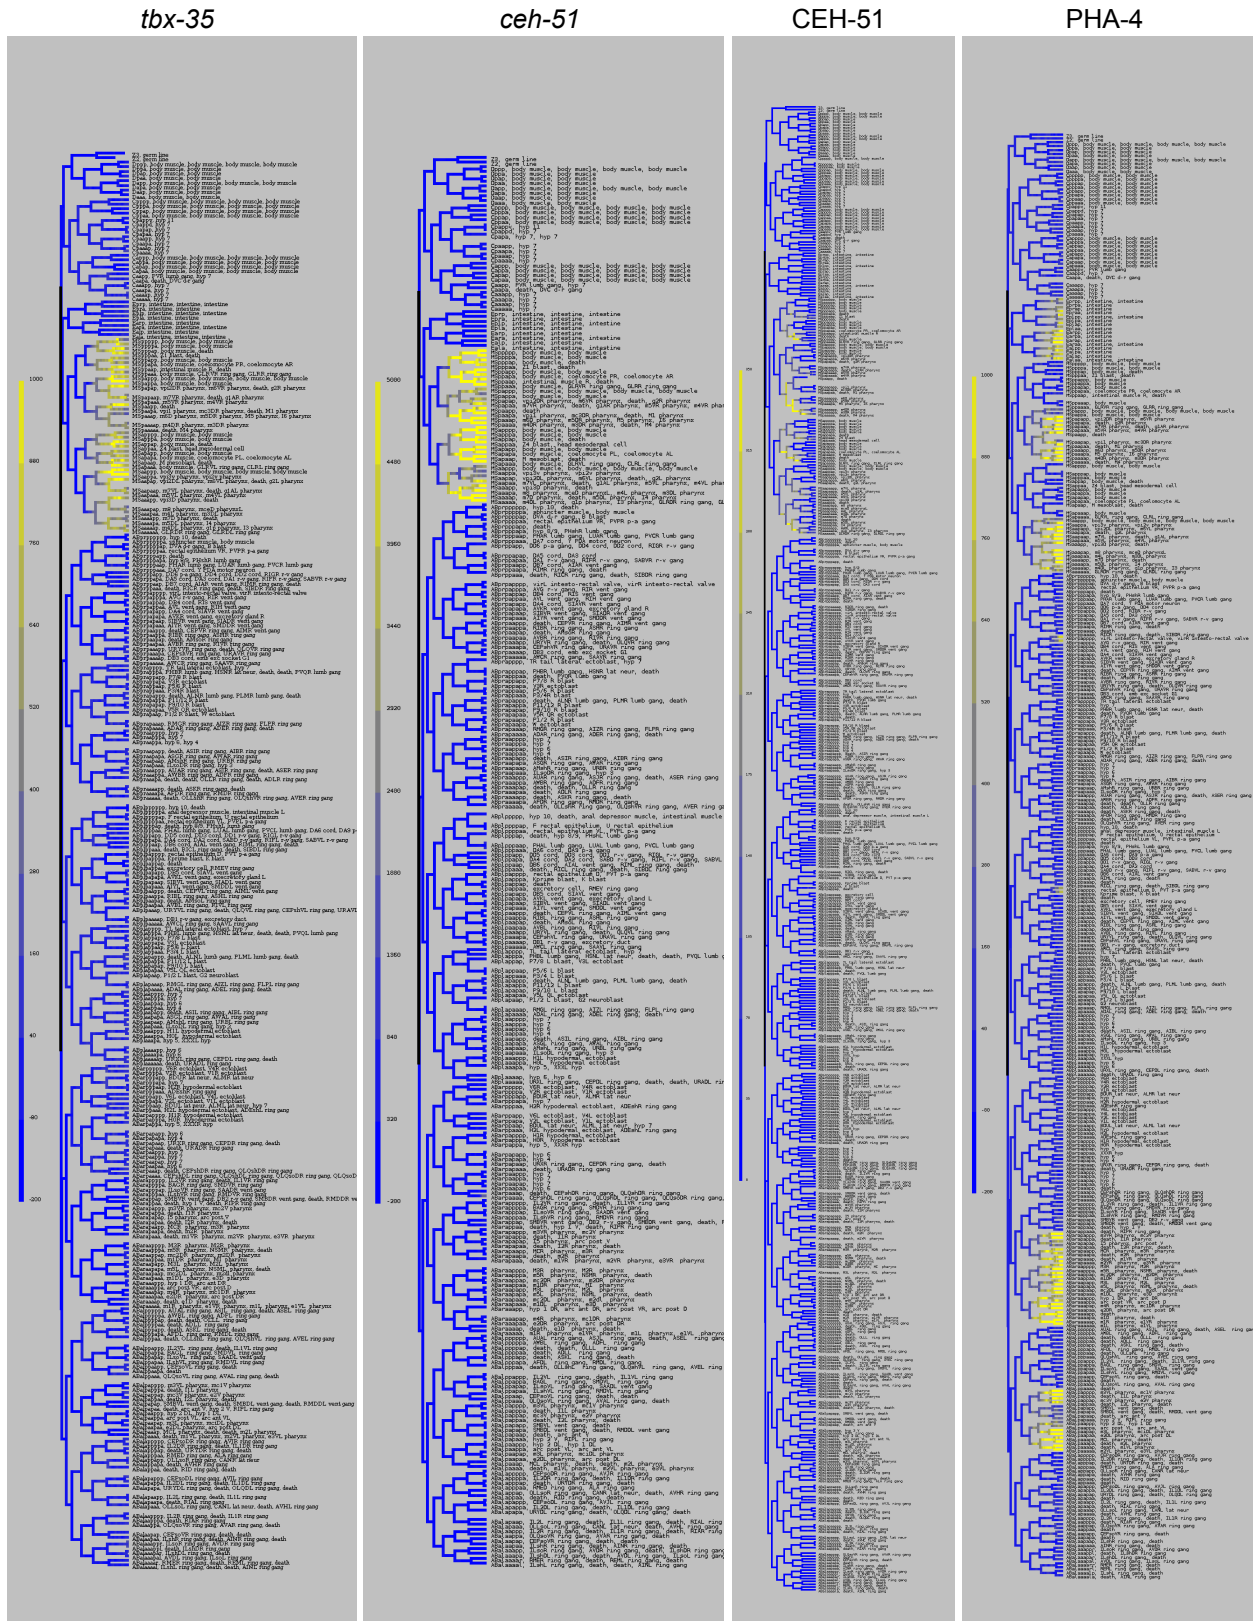

901  
902  
903

904 **Fig S2. Several early embryonic genes are expressed with anterior bias.**

905 Full lineage expression patterns are shown for integrated transgenic promoter reporters of *tbx-35*  
906 and *ceh-51*; for an integrated transgenic protein reporter of PHA-4; and for a CRISPR knock-in  
907 protein reporter of CEH-51.

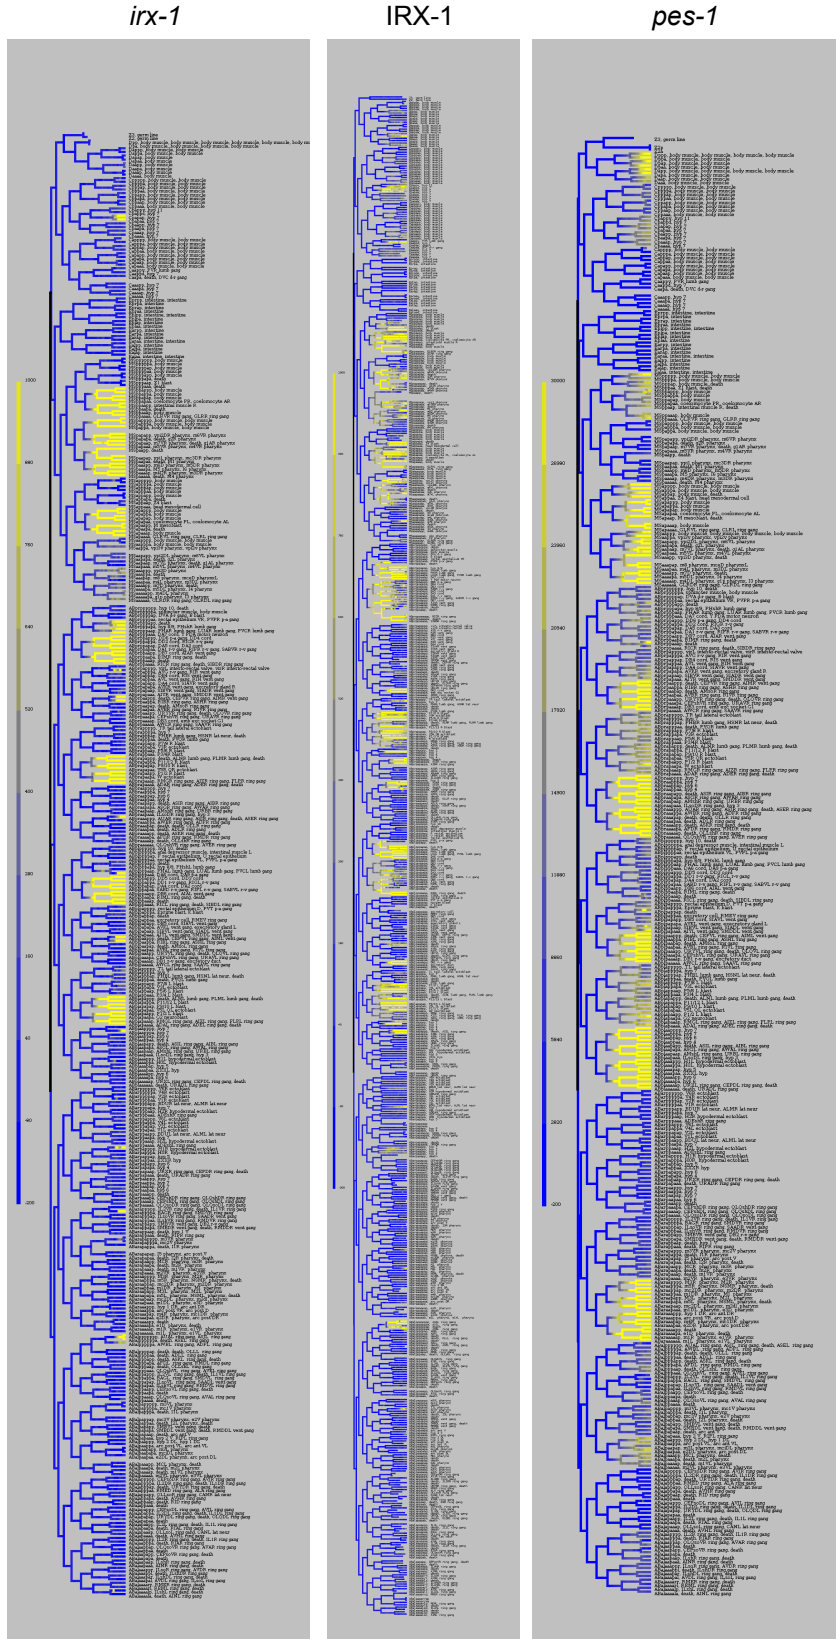

908  
909  
910

911 **Fig S3. Several early embryonic genes are expressed with anterior bias.**  
912 Full lineage expression patterns are shown for integrated transgenic promoter reporters of *irx-1*  
913 and *pes-1*; and for an integrated transgenic protein reporter of IRX-1.  
914  
915

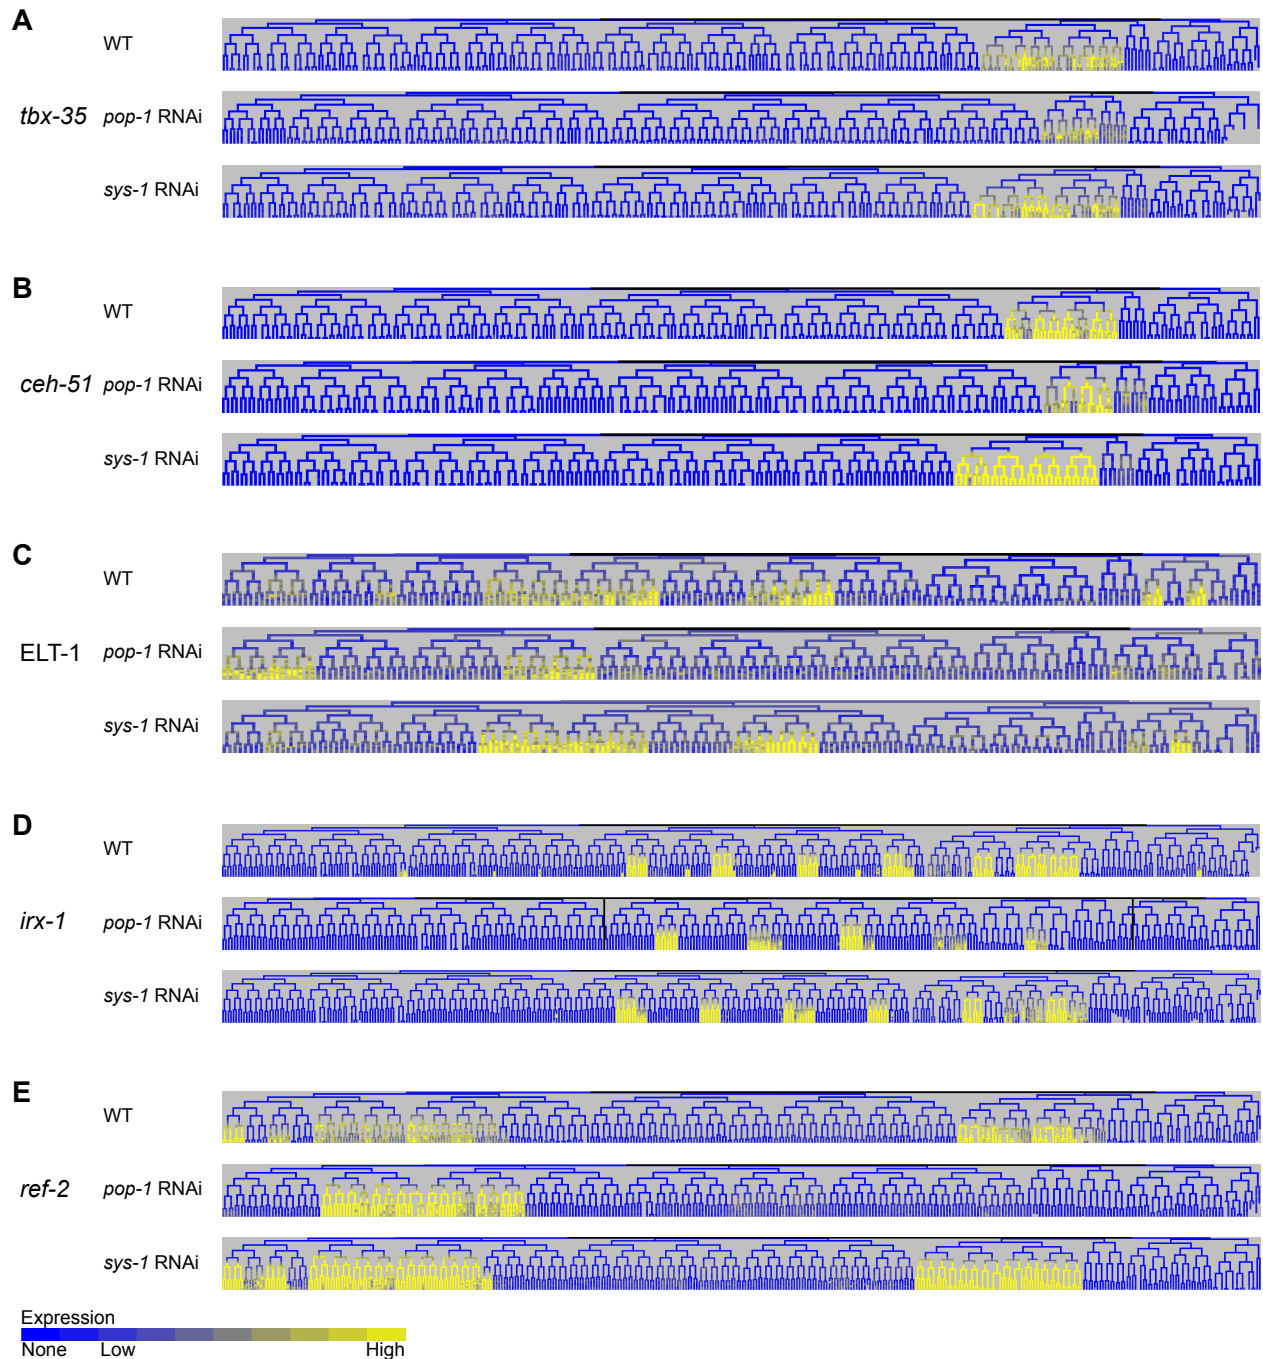

916

917

918 **Fig S4. Anterior genes are regulated by Wnt effectors *pop-1* and *sys-1*.**

919 Full example WT, *pop-1* RNAi, and *sys-1* RNAi lineages are shown for integrated transgenic  
920 promoter reporters of *tbx-35* (A), *ceh-51* (B), *irx-1* (D), and *ref-2* (E) and for an integrated  
921 transgenic protein reporter of ELT-1 (C).

922

923



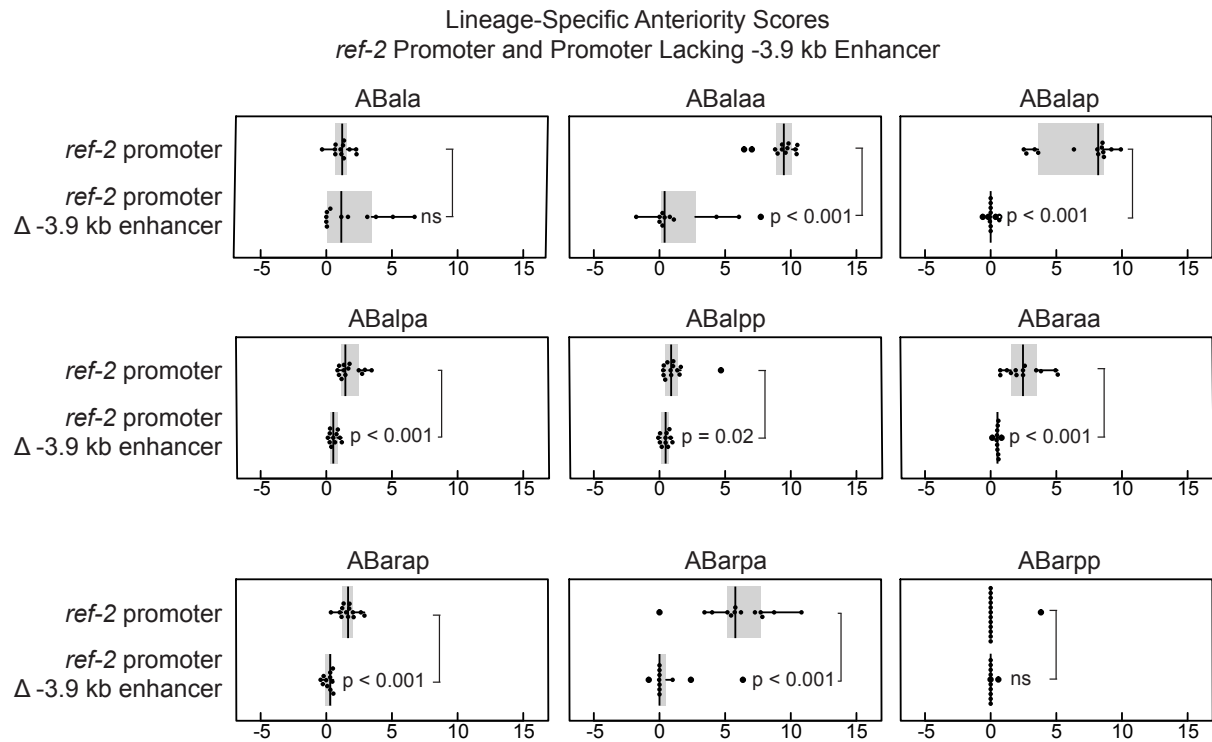

924  
925

926 **Fig S5. Deletion of the -3.9 kb enhancer from the *ref-2* promoter causes a reduction in the**  
927 **anterior bias in the expression driven by the promoter in most ABA sublineages in which the**  
928 **full-length promoter drives anterior-biased expression.**

929 Box plots display anteriority scores of lineages descended from indicated cells.

930

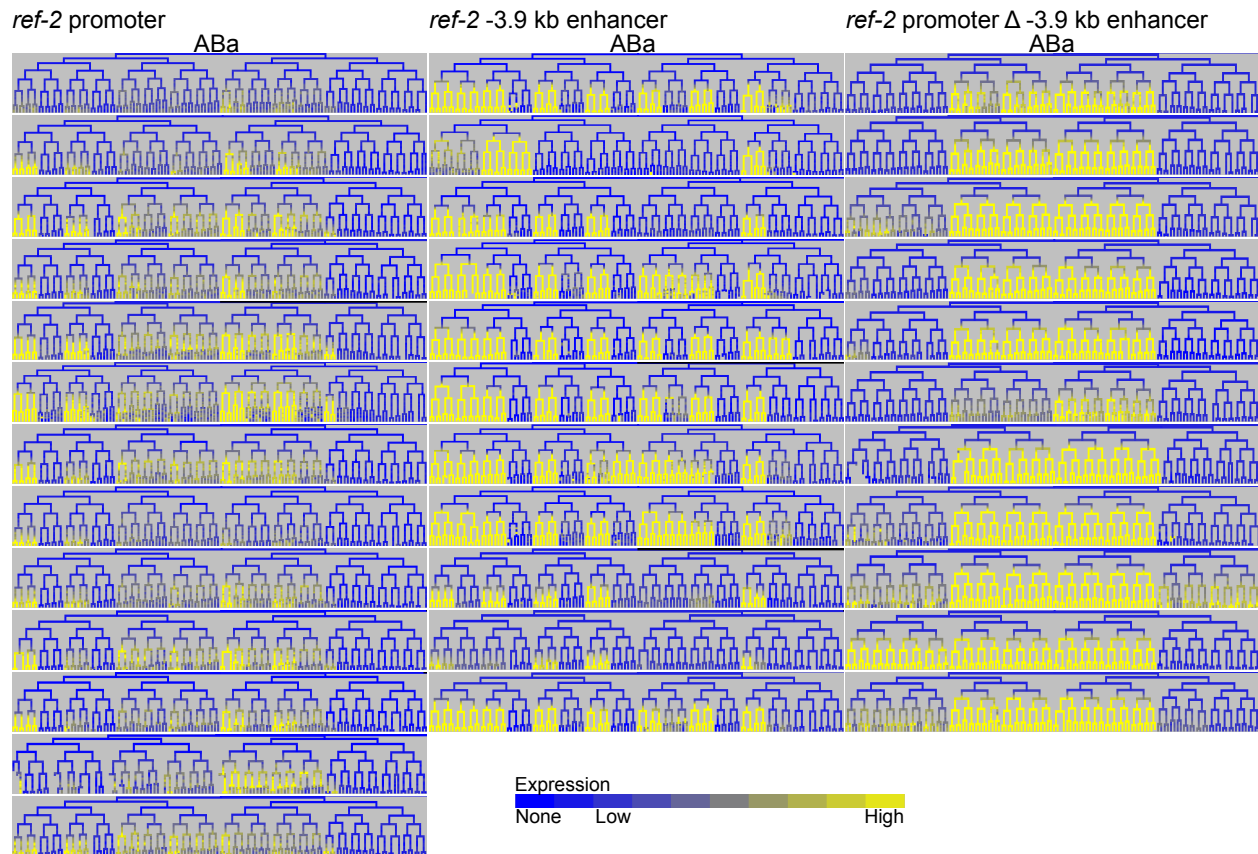

931  
932  
933  
934  
935  
936  
937

**Fig S6. Expression patterns driven by the *ref-2* promoter, the -3.9 kb enhancer, and the promoter lacking the -3.9 kb enhancer are somewhat variable.**

Displayed here are partial lineages for all analyzed embryos bearing these reporters to show the variation in their expression.

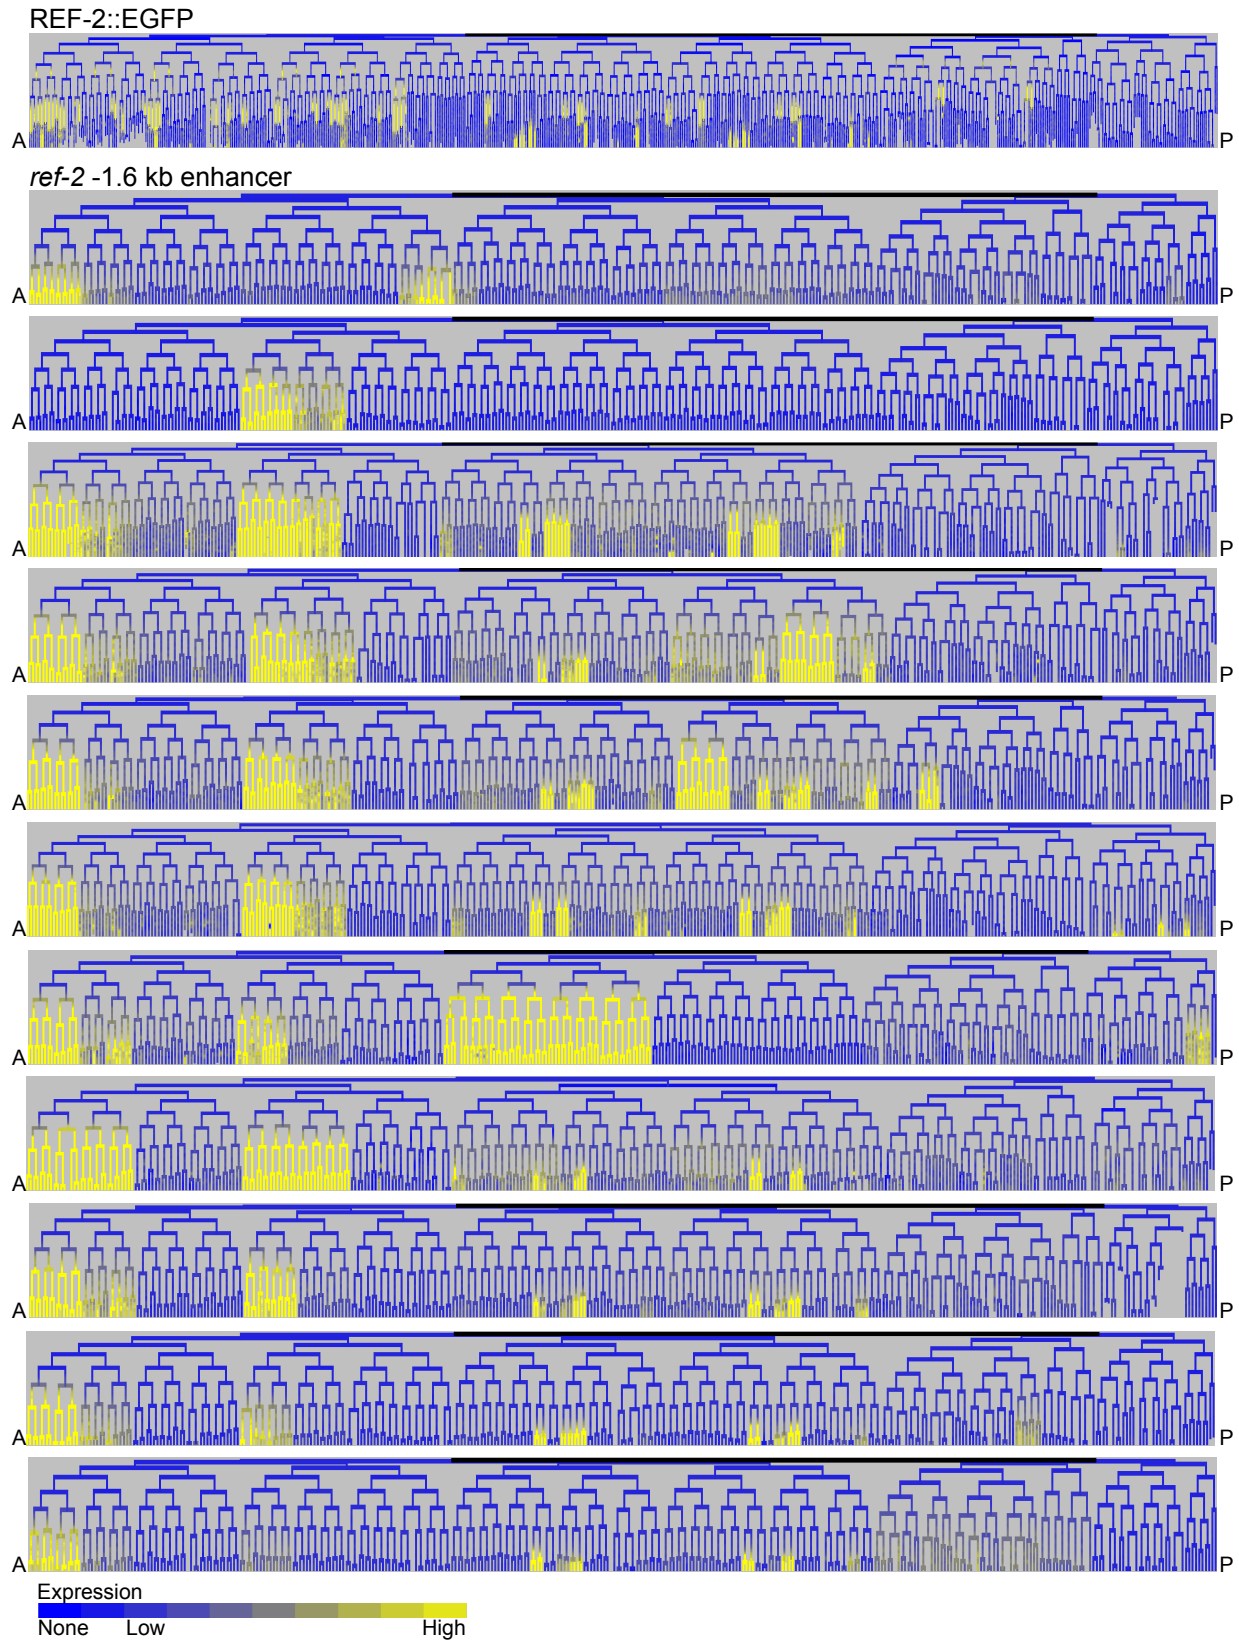

938

939

940

941 **Fig S7. Expression patterns driven by the *ref-2* -1.6 kb enhancer are variable.**  
942 Displayed here are full lineages for all analyzed embryos bearing this reporter to show the variation  
943 in its expression.  
944

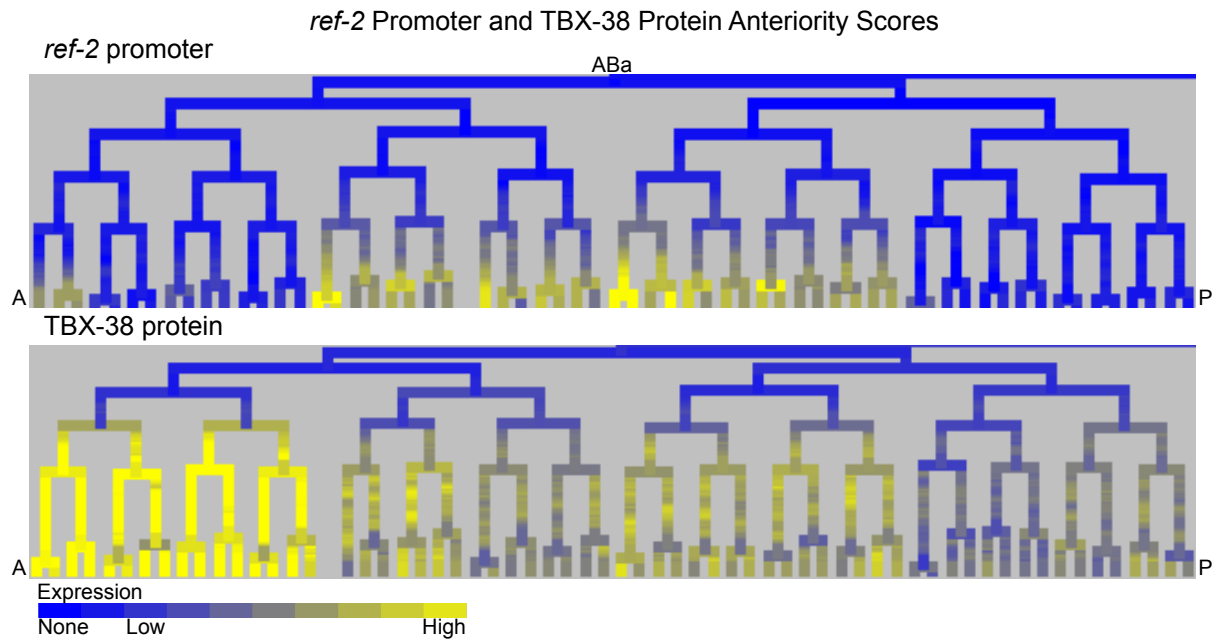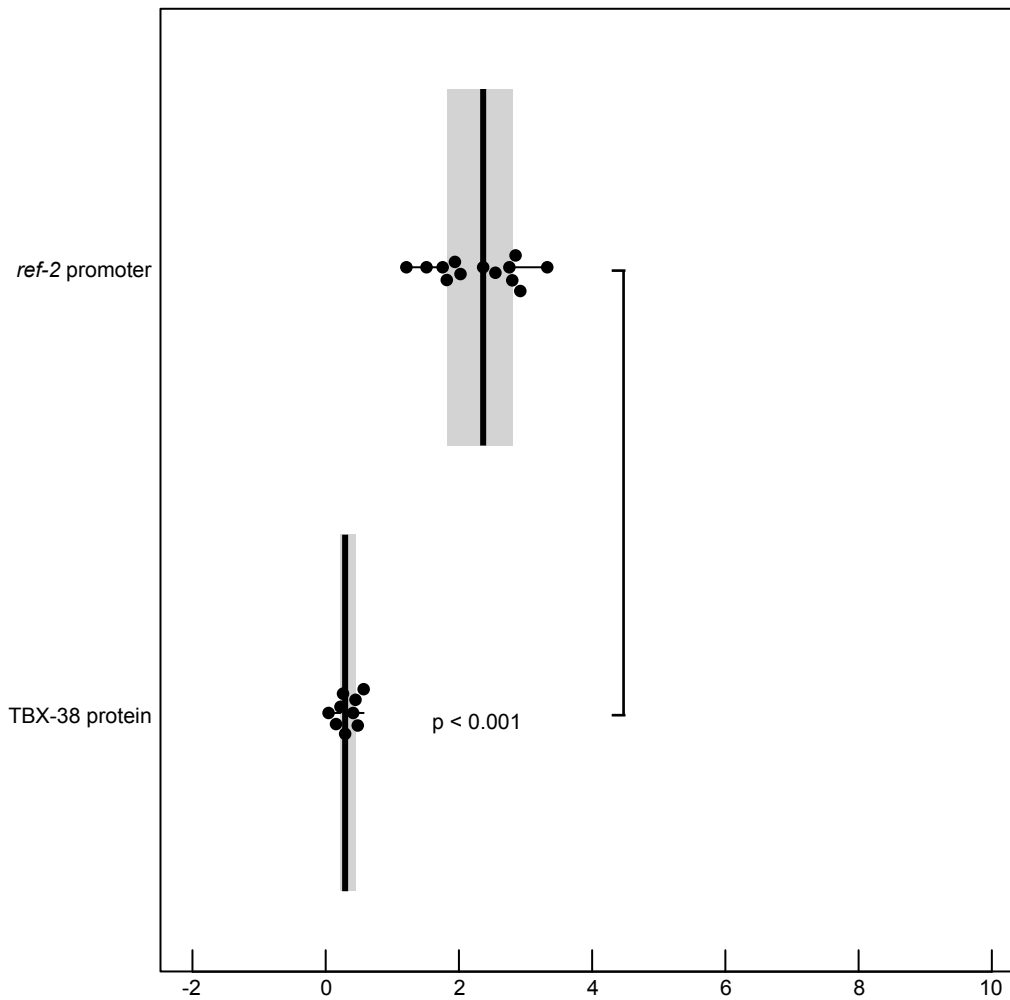

947 **Fig S8. A TBX-38::GFP CRISPR knock-in protein reporter has minimally anterior-biased**  
948 **expression in the lineages in which the *ref-2* promoter drives anterior-biased expression.**  
949 Displayed are partial lineages of the *Pref-2::his-24::mCherry* promoter reporter expression and the  
950 TBX-38::GFP CRISPR knock-in expression. The box plot shows the mean anteriority scores for  
951 the *ref-2* promoter reporter and the TBX-38::GFP CRISPR knock-in for the same lineages as in  
952 Fig 5J.  
953

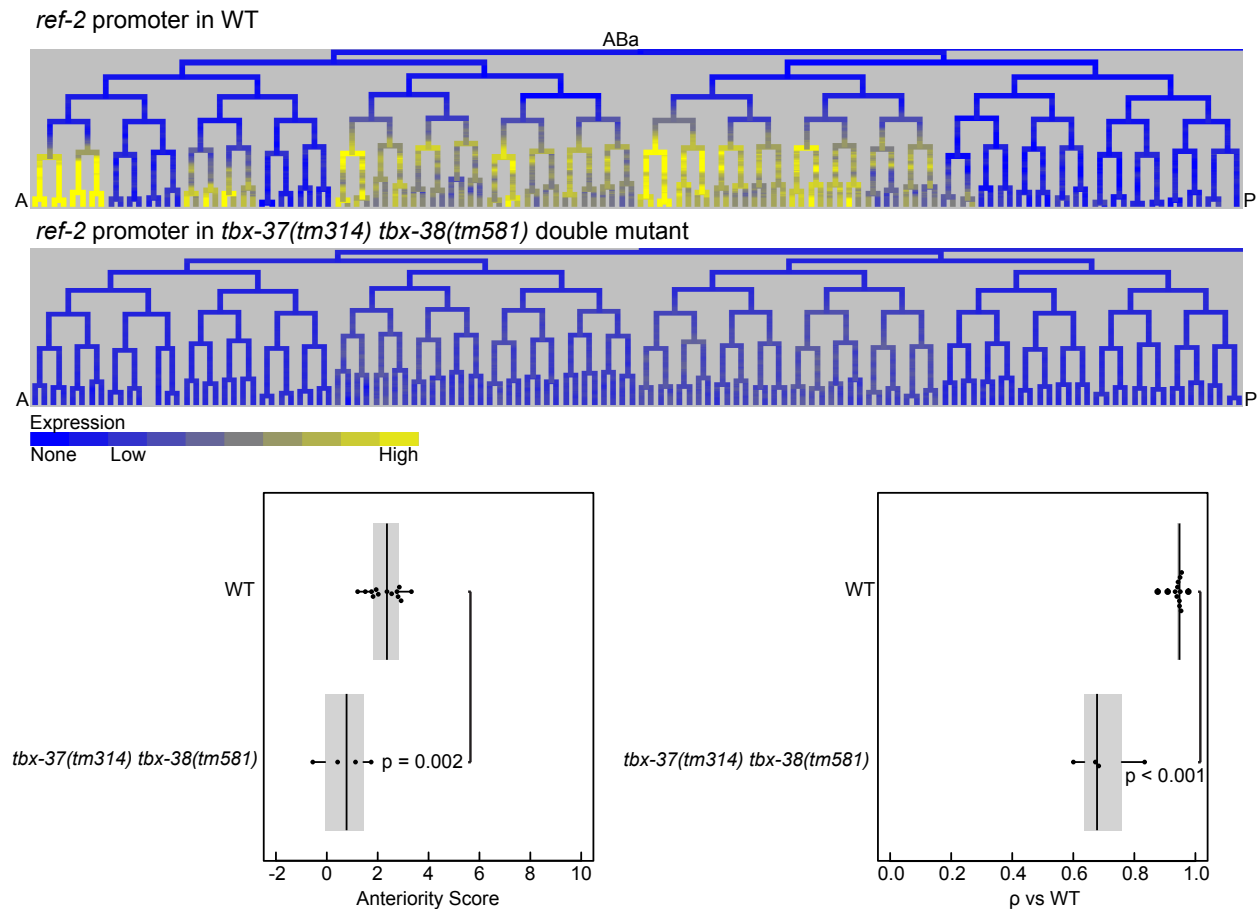

954  
955  
956  
957  
958  
959  
960  
961  
962  
963  
964  
965

**Fig S9. *tbx-37* and *tbx-38* are required for *ref-2* promoter-driven anterior-biased expression in the ABA lineage.**

Displayed are partial lineages for the expression driven by the *ref-2* promoter in a WT background and in a *tbx-37(tm314) tbx-38(tm581)* double mutant background. Also shown are box plots of anteriority scores and Spearman's  $\rho$  for each of these groups, indicating a loss of anterior bias and correlation to WT for the *ref-2* promoter expression pattern in *tbx-37 tbx-38* double mutant embryos. Lineages used to determine anteriority scores are the same as in Fig 5J Spearman's  $\rho$  analysis uses the full ABA lineage expression pattern and was calculated relative to the *ref-2* promoter in the WT background.

**A** *ref-2* -3.9 kb enhancer (1-449)

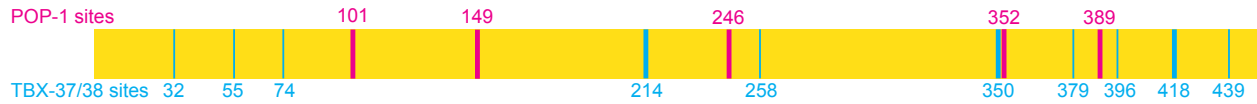

**B**

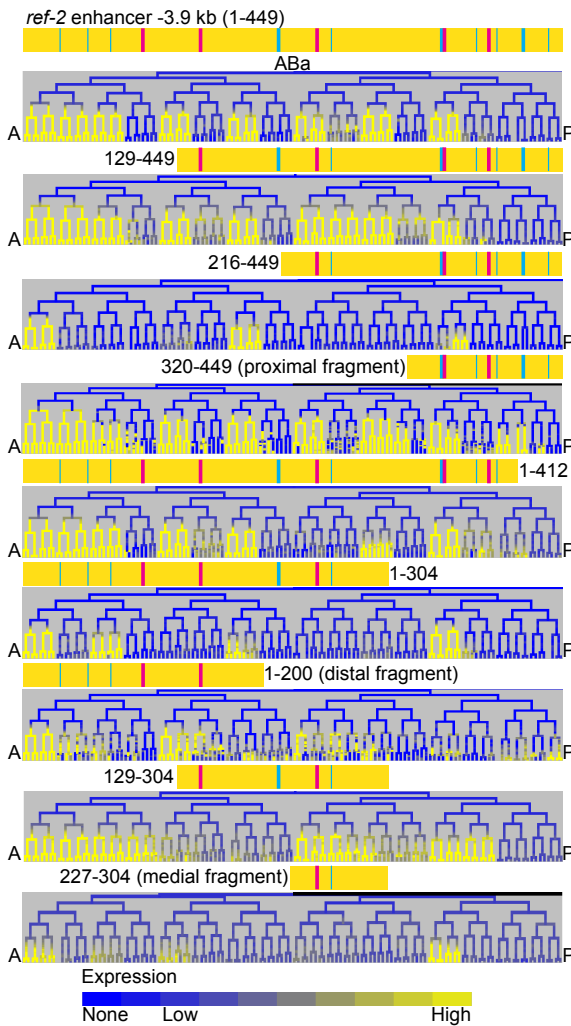

**C**

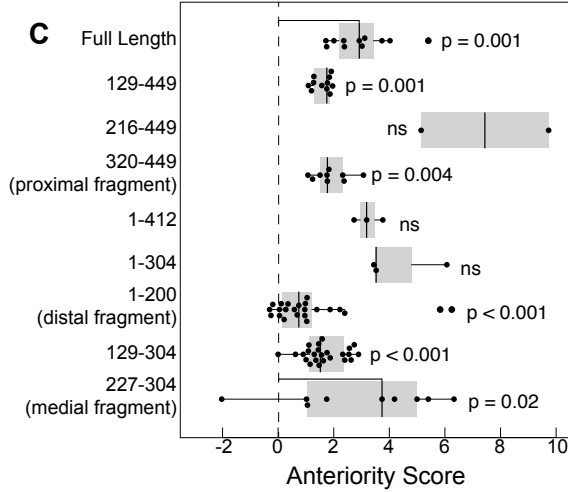

**D**

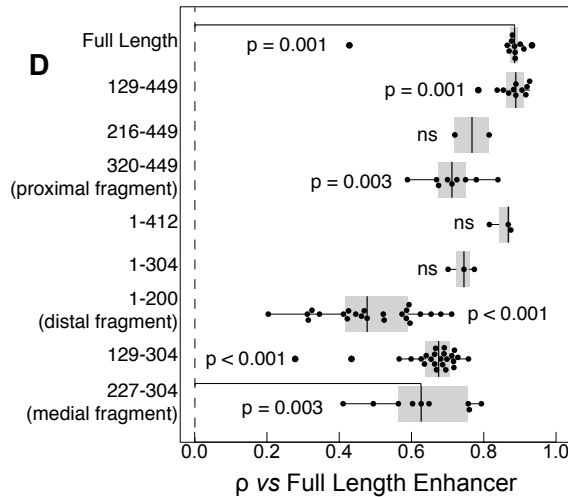

966

967

968

969

970

971

972

973

974

975

976

**Fig S10. Three non-overlapping fragments of the -3.9 kb enhancer are each sufficient to drive anterior-biased expression in the ABa lineage of the early embryo.**

(A) Model of the *ref-2* -3.9 kb enhancer with predicted TBX-37/38 and POP-1 sites indicated as in Fig 6. (B) Expression patterns driven by full-length *ref-2* -3.9 kb enhancer and by all tested fragments. (C-D) Box plots displaying the anteriority scores (C) and Spearman's  $\rho$  (D) for the full-length *ref-2* -3.9 kb enhancer and all tested fragments. Lineages used to determine anteriority scores are the same as in Fig 5J. Spearman's  $\rho$  analysis uses the full ABa lineage and was calculated relative to the full-length -3.9 kb enhancer.



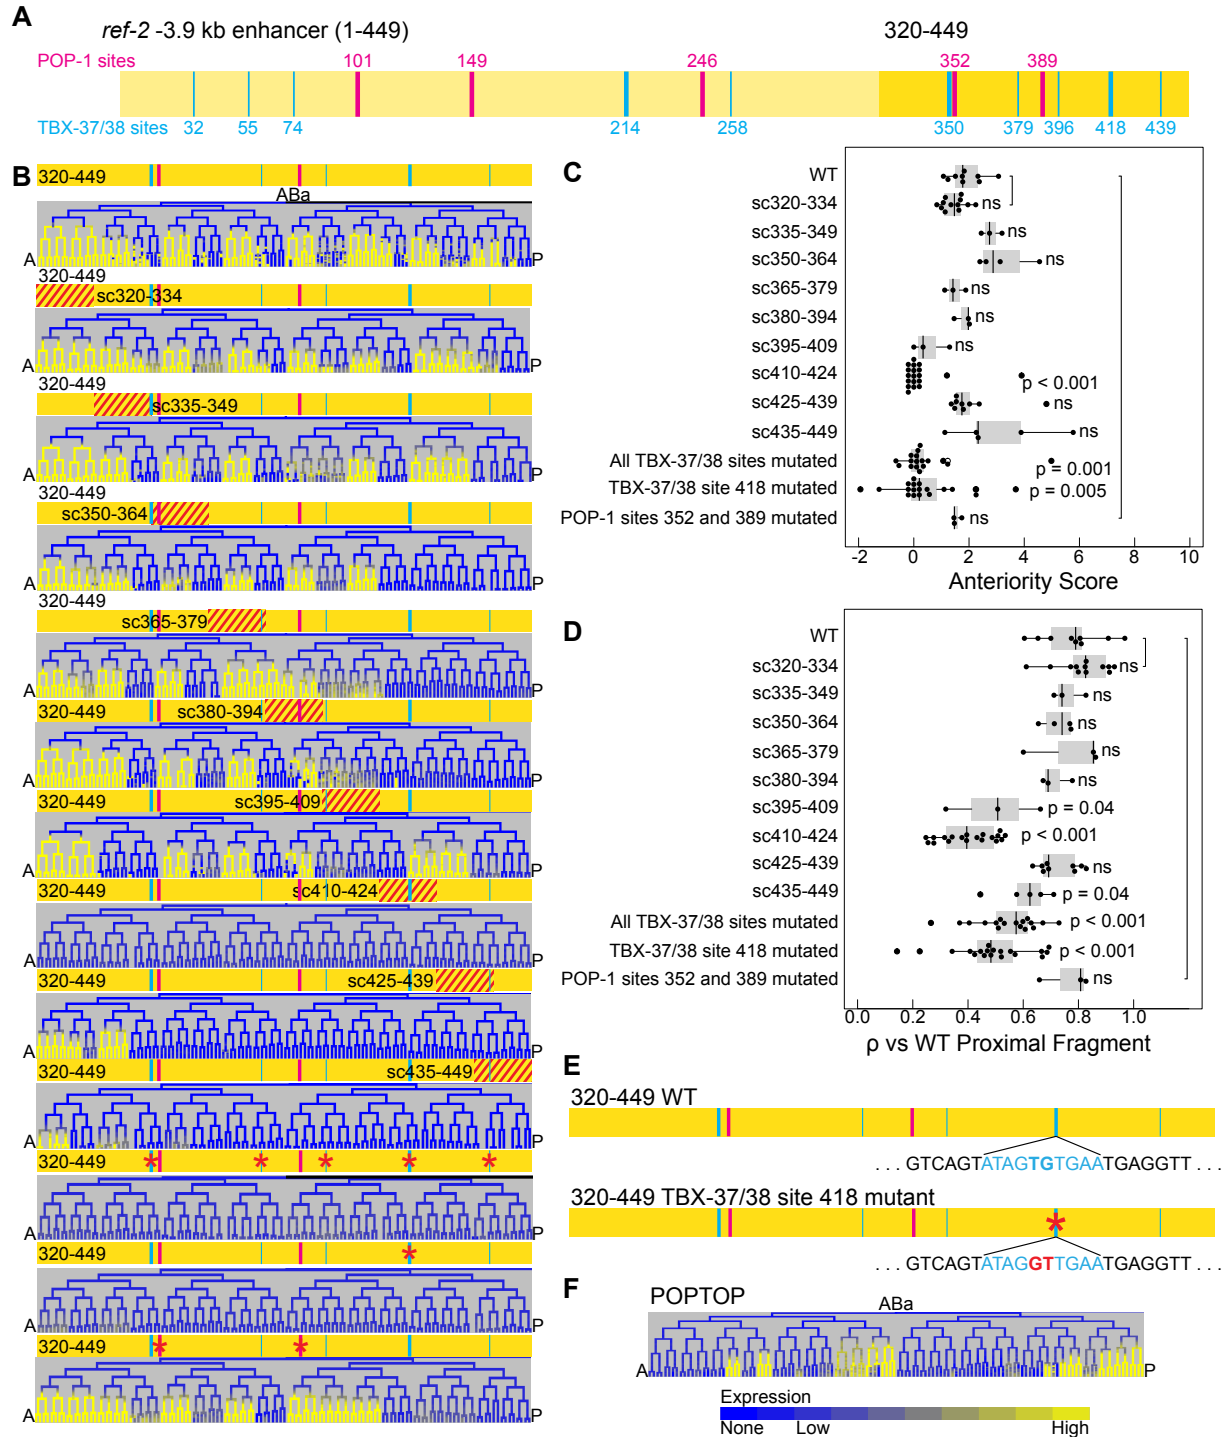

977  
978

979 **Fig S11. The broadly-expressed transcription factors *tbx-37* and *tbx-38* are required for the**  
980 **anterior-biased expression of *ref-2* in the ABA lineage.**

981 (A) Model of the *ref-2* -3.9 kb enhancer with proximal fragment (base pairs 320-449) highlighted.  
982 Predicted TBX-37/38 and POP-1 sites are indicated as in Fig 6. (B) Expression patterns driven by  
983 WT proximal fragment of the *ref-2* -3.9 kb enhancer, with each 15 base-pair segment of the  
984 fragment scrambled, with all predicted TBX-37/38 sites mutated, with *TBX*<sub>418</sub> mutated, and with

985 the two predicted POP-1 sites mutated. (C-D) Box plots displaying the anteriority scores (C) and  
986 Spearman's  $\rho$  (D) for the WT proximal fragment, with each 15 base-pair segment of the fragment  
987 scrambled, with all predicted TBX-37/38 sites mutated, with *TBX<sub>418</sub>* mutated, and with the two  
988 predicted POP-1 sites mutated. Lineages used to determine anteriority scores are the same as in  
989 Fig 5J. Spearman's  $\rho$  analysis uses the full ABa lineage and was calculated relative to the WT  
990 proximal fragment. (E) Models of the proximal fragment of the *ref-2* -3.9 kb enhancer with the  
991 WT sequence of *TBX<sub>418</sub>* and the mutated sequence used in the *TBX<sub>418</sub>* mutant reporters. (F)  
992 Expression pattern driven by the seven-copy POP-1 site concatemer POPTOP [13,51].  
993

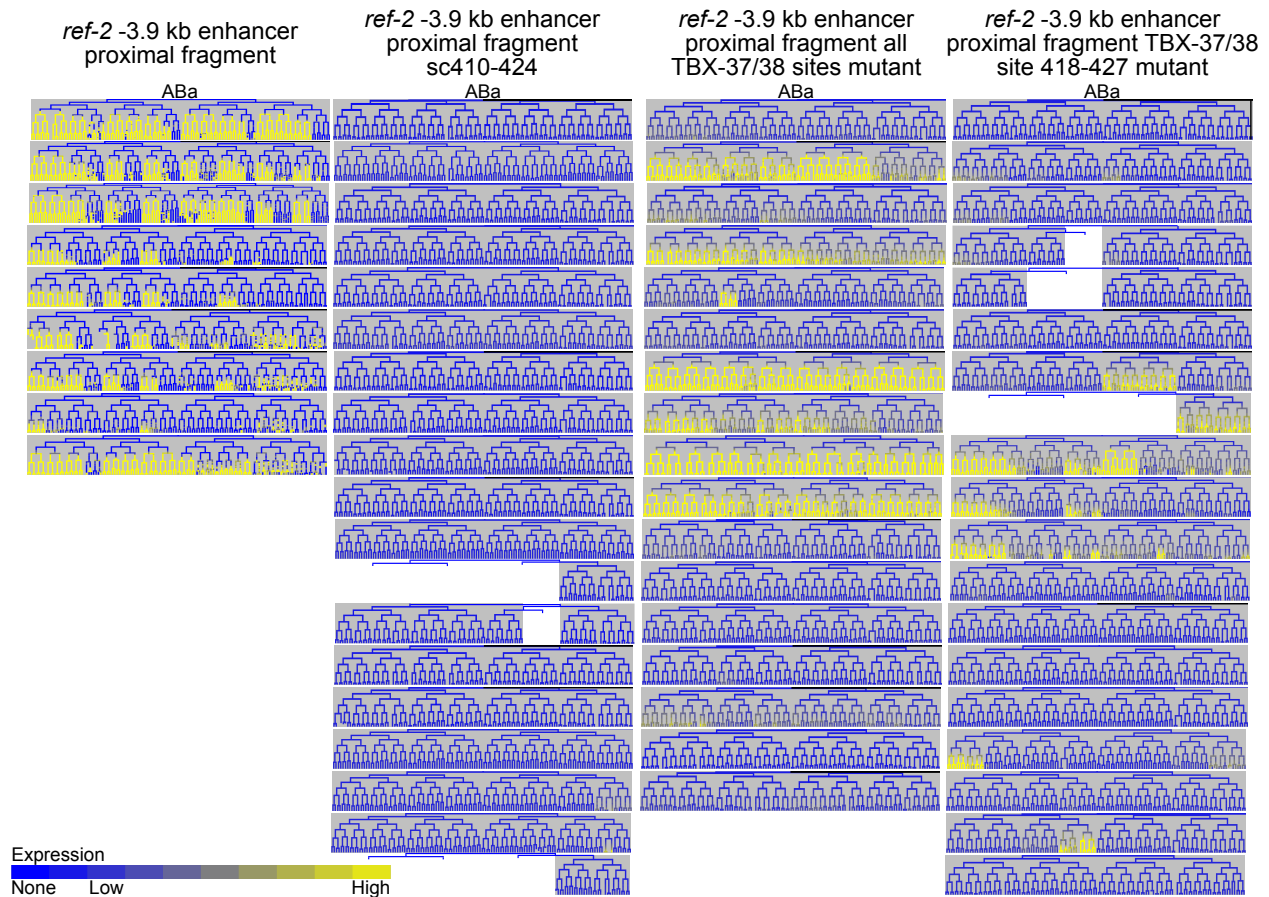

**Fig S12. *ref-2* -3.9 kb enhancer WT proximal fragment, proximal fragment with all TBX-37/38 sites mutated, and proximal fragment with *TBX*<sub>418</sub> mutated exhibit variation in their expression patterns.**

Displayed are partial lineages for all analyzed embryos expressing reporters for the -3.9 kb enhancer WT proximal fragment, the *ref-2* -3.9 kb enhancer proximal fragment with base pairs 410-424 scrambled, the *ref-2* -3.9 kb enhancer proximal fragment with all TBX-37/38 sites mutated, and the *ref-2* -3.9 kb enhancer proximal fragment with *TBX*<sub>418</sub> mutated to show the variation in the expression pattern for each of these reporters.

1005 Table S1:  
1006 *Caenorhabditis elegans* strain list  
1007  
1008 Table S2:  
1009 *Escherichia coli* strain list  
1010  
1011 Table S3:  
1012 Quantitative analyses raw data  
1013  
1014 Table S4:  
1015 Anterior gene summary expression data  
1016  
1017 Table S5:  
1018 Recombinant DNA list  
1019  
1020 Acknowledgements:  
1021 We thank J. Archibald Millar for help with data analysis, Julia Richards for collecting and  
1022 lineaging the PHA-4 movie, and Shaili Patel for her contributions as a laboratory technician. We  
1023 thank Meera Sundaram for kindly permitting us to use her injection equipment. We thank Jonathan  
1024 Rumley's PhD thesis committee members for helpful discussions, including committee chair  
1025 Christopher Brown and committee members Michael Atchison, Peter Klein, Mary Mullins, and  
1026 Meera Sundaram. Some strains were provided by the CGC, which is funded by NIH Office of  
1027 Research Infrastructure Programs (P40 OD010440). We also thank the Waterston lab, the Maduro  
1028 lab, and the Cochella lab for kindly providing us with *C.elegans* strains. We thank the *C. elegans*  
1029 Reverse Genetics Core Facility at the University of British Columbia, which is part of the  
1030 international *C. elegans* Gene Knockout Consortium, which produced the *ref-2* mutant allele (*ref-*  
1031 *2(gk178)*) used in this study. This work was funded by T32GM008216, F31GM123737, and  
1032 R35GM130357.  
1033  
1034

1035 **References Cited**

- 1036 1. Hikasa H, Sokol SY. Wnt signaling in vertebrate axis specification. *Cold Spring Harb*  
1037 *Perspect Biol.* 2013;5: a007955. doi:10.1101/cshperspect.a007955
- 1038 2. Archbold HC, Yang YX, Chen L, Cadigan KM. How do they do Wnt they do?: regulation  
1039 of transcription by the Wnt/ $\beta$ -catenin pathway. *Acta Physiol Oxf Engl.* 2012;204: 74–109.  
1040 doi:10.1111/j.1748-1716.2011.02293.x
- 1041 3. Martin BL, Kimelman D. Wnt signaling and the evolution of embryonic posterior  
1042 development. *Curr Biol CB.* 2009;19: R215–R219. doi:10.1016/j.cub.2009.01.052
- 1043 4. Zacharias AL, Murray JI. Combinatorial decoding of the invariant *C. elegans* embryonic  
1044 lineage in space and time. *genesis.* 2016;54: 182–197. doi:10.1002/dvg.22928
- 1045 5. Sulston JE, Schierenberg E, White JG, Thomson JN. The embryonic cell lineage of the  
1046 nematode *Caenorhabditis elegans*. *Dev Biol.* 1983;100: 64–119. doi:10.1016/0012-  
1047 1606(83)90201-4
- 1048 6. Bürglin TR, Finney M, Coulson A, Ruvkun G. *Caenorhabditis elegans* has scores of  
1049 homoeobox-containing genes. *Nature.* 1989;341: 239–243. doi:10.1038/341239a0
- 1050 7. Chen W, Lim HH, Lim L. A new member of the ras superfamily, the rac1 homologue from  
1051 *Caenorhabditis elegans*. Cloning and sequence analysis of cDNA, pattern of developmental  
1052 expression, and biochemical characterization of the protein. *J Biol Chem.* 1993;268: 320–  
1053 324. doi:10.1016/S0021-9258(18)54152-1
- 1054 8. van den Heuvel S. Cell-cycle regulation. *WormBook.* 2005. pp. 1–16.  
1055 doi:10.1895/wormbook.1.28.1
- 1056 9. Shaye DD, Greenwald I. OrthoList: A Compendium of *C. elegans* Genes with Human  
1057 Orthologs. *PLOS ONE.* 2011;6: e20085. doi:10.1371/journal.pone.0020085
- 1058 10. Kim W, Underwood RS, Greenwald I, Shaye DD. OrthoList 2: A New Comparative  
1059 Genomic Analysis of Human and *Caenorhabditis elegans* Genes. *Genetics.* 2018;210: 445–  
1060 461. doi:10.1534/genetics.118.301307
- 1061 11. Herman M. *C. elegans* POP-1/TCF functions in a canonical Wnt pathway that controls cell  
1062 migration and in a noncanonical Wnt pathway that controls cell polarity. *Development.*  
1063 2001;128: 581–590. doi:10.1242/dev.128.4.581
- 1064 12. Mizumoto K, Sawa H. Two  $\beta$ s or not two  $\beta$ s: regulation of asymmetric division by  $\beta$ -  
1065 catenin. *Trends Cell Biol.* 2007;17: 465–473. doi:10.1016/j.tcb.2007.08.004
- 1066 13. Zacharias AL, Walton T, Preston E, Murray JI. Quantitative Differences in Nuclear  $\beta$ -  
1067 catenin and TCF Pattern Embryonic Cells in *C. elegans*. Sternberg PW, editor. *PLOS*  
1068 *Genet.* 2015;11: e1005585. doi:10.1371/journal.pgen.1005585

- 1069 14. Lin R, Hill RJ, Priess JR. POP-1 and anterior-posterior fate decisions in *C. elegans*  
1070 embryos. *Cell*. 1998;92: 229–239.
- 1071 15. Maduro MF, Lin R, Rothman JH. Dynamics of a developmental switch: recursive  
1072 intracellular and intranuclear redistribution of *Caenorhabditis elegans* POP-1 parallels Wnt-  
1073 inhibited transcriptional repression. *Dev Biol*. 2002;248: 128–142.  
1074 doi:10.1006/dbio.2002.0721
- 1075 16. Huang S, Shetty P, Robertson SM, Lin R. Binary cell fate specification during *C. elegans*  
1076 embryogenesis driven by reiterated reciprocal asymmetry of TCF POP-1 and its  
1077 coactivator  $\beta$ -catenin SYS-1. *Development*. 2007;134: 2685–2695. doi:10.1242/dev.008268
- 1078 17. Calvo D, Victor M, Gay F, Sui G, Po-Shan Luke M, Dufourcq P, et al. A POP-1 repressor  
1079 complex restricts inappropriate cell type-specific gene transcription during *Caenorhabditis*  
1080 *elegans* embryogenesis. *EMBO J*. 2001;20: 7197–7208. doi:10.1093/emboj/20.24.7197
- 1081 18. Maduro MF, Kasmir JJ, Zhu J, Rothman JH. The Wnt effector POP-1 and the PAL-  
1082 1/Caudal homeoprotein collaborate with SKN-1 to activate *C. elegans* endoderm  
1083 development. *Dev Biol*. 2005;285: 510–523. doi:10.1016/j.ydbio.2005.06.022
- 1084 19. Owraghi M, Broitman-Maduro G, Luu T, Roberson H, Maduro MF. Roles of the Wnt  
1085 effector POP-1/TCF in the *C. elegans* endomesoderm specification gene network. *Dev Biol*.  
1086 2010;340: 209–221. doi:10.1016/j.ydbio.2009.09.042
- 1087 20. Murgan S, Kari W, Rothbacher U, Iché-Torres M, Méléne P, Hobert O, et al. Atypical  
1088 Transcriptional Activation by TCF via a Zic Transcription Factor in *C. elegans* Neuronal  
1089 Precursors. *Dev Cell*. 2015;33: 737–745. doi:10.1016/j.devcel.2015.04.018
- 1090 21. Murgan S, Bertrand V. How targets select activation or repression in response to Wnt.  
1091 *Worm*. 2015;4: e1086869. doi:10.1080/21624054.2015.1086869
- 1092 22. Zhang CU, Blauwkamp TA, Burby PE, Cadigan KM. Wnt-Mediated Repression via  
1093 Bipartite DNA Recognition by TCF in the *Drosophila* Hematopoietic System. Desplan C,  
1094 editor. *PLoS Genet*. 2014;10: e1004509. doi:10.1371/journal.pgen.1004509
- 1095 23. Sulston JE, Horvitz HR. Post-embryonic cell lineages of the nematode, *Caenorhabditis*  
1096 *elegans*. *Dev Biol*. 1977;56: 110–156. doi:10.1016/0012-1606(77)90158-0
- 1097 24. Murray JI, Boyle TJ, Preston E, Vafeados D, Mericle B, Weisdepp P, et al.  
1098 Multidimensional regulation of gene expression in the *C. elegans* embryo. *Genome Res*.  
1099 2012;22: 1282–1294. doi:10.1101/gr.131920.111
- 1100 25. Ma X, Zhao Z, Xiao L, Xu W, Kou Y, Zhang Y, et al. A 4D single-cell protein atlas of  
1101 transcription factors delineates spatiotemporal patterning during embryogenesis. *Nat*  
1102 *Methods*. 2021;18: 893–902. doi:10.1038/s41592-021-01216-1
- 1103 26. Murray JI, Bao Z, Boyle TJ, Boeck ME, Mericle BL, Nicholas TJ, et al. Automated  
1104 analysis of embryonic gene expression with cellular resolution in *C. elegans*. *Nat Methods*.

- 1105 2008;5: 703–709. doi:10.1038/nmeth.1228
- 1106 27. Packer Jonathan S., Zhu Qin, Huynh Chau, Sivaramkrishnan Priya, Preston Elicia, Dueck  
1107 Hannah, et al. A lineage-resolved molecular atlas of *C. elegans* embryogenesis at single-cell  
1108 resolution. *Science*. 2019;365: eaax1971. doi:10.1126/science.aax1971
- 1109 28. Bao Z, Murray JI, Boyle T, Ooi SL, Sandel MJ, Waterston RH. Automated cell lineage  
1110 tracing in *Caenorhabditis elegans*. *Proc Natl Acad Sci U S A*. 2006;103: 2707.  
1111 doi:10.1073/pnas.0511111103
- 1112 29. Santella A, Du Z, Nowotschin S, Hadjantonakis A-K, Bao Z. A hybrid blob-slice model for  
1113 accurate and efficient detection of fluorescence labeled nuclei in 3D. *BMC Bioinformatics*.  
1114 2010;11: 580. doi:10.1186/1471-2105-11-580
- 1115 30. Boyle TJ, Bao Z, Murray JI, Araya CL, Waterston RH. AceTree: a tool for visual analysis  
1116 of *Caenorhabditis elegans* embryogenesis. *BMC Bioinformatics*. 2006;7: 275.  
1117 doi:10.1186/1471-2105-7-275
- 1118 31. Katzman B, Tang D, Santella A, Bao Z. AceTree: a major update and case study in the long  
1119 term maintenance of open-source scientific software. *BMC Bioinformatics*. 2018;19: 121.  
1120 doi:10.1186/s12859-018-2127-0
- 1121 32. Yanai I, Baugh LR, Smith JJ, Roehrig C, Shen-Orr SS, Claggett JM, et al. Pairing of  
1122 competitive and topologically distinct regulatory modules enhances patterned gene  
1123 expression. *Mol Syst Biol*. 2008;4. doi:10.1038/msb.2008.6
- 1124 33. Lin R, Thompson S, Priess JR. *pop-1* encodes an HMG box protein required for the  
1125 specification of a mesoderm precursor in early *C. elegans* embryos. *Cell*. 1995;83: 599–  
1126 609. doi:10.1016/0092-8674(95)90100-0
- 1127 34. Kidd AR, Miskowski JA, Siegfried KR, Sawa H, Kimble J. A  $\beta$ -Catenin Identified by  
1128 Functional Rather Than Sequence Criteria and Its Role in Wnt/MAPK Signaling. *Cell*.  
1129 2005;121: 761–772. doi:10.1016/j.cell.2005.03.029
- 1130 35. Phillips BT, Kidd AR, King R, Hardin J, Kimble J. Reciprocal asymmetry of SYS-1/beta-  
1131 catenin and POP-1/TCF controls asymmetric divisions in *Caenorhabditis elegans*. *Proc Natl*  
1132 *Acad Sci*. 2007;104: 3231–3236. doi:10.1073/pnas.0611507104
- 1133 36. Broitman-Maduro G, Owrighi M, Hung WWK, Kuntz S, Sternberg PW, Maduro MF. The  
1134 NK-2 class homeodomain factor CEH-51 and the T-box factor TBX-35 have overlapping  
1135 function in *C. elegans* mesoderm development. *Dev Camb Engl*. 2009;136: 2735–2746.  
1136 doi:10.1242/dev.038307
- 1137 37. Broitman-Maduro G, Lin KT-H, Hung WWK, Maduro MF. Specification of the *C. elegans*  
1138 MS blastomere by the T-box factor TBX-35. *Dev Camb Engl*. 2006;133: 3097–3106.  
1139 doi:10.1242/dev.02475
- 1140 38. Alper S, Kenyon C. The zinc finger protein REF-2 functions with the Hox genes to inhibit

- 1141 cell fusion in the ventral epidermis of *C. elegans*. *Development*. 2002;129: 3335–3348.  
1142 doi:10.1242/dev.129.14.3335
- 1143 39. Walton T, Preston E, Nair G, Zacharias AL, Raj A, Murray JI. The Bicoid Class  
1144 Homeodomain Factors *ceh-36/OTX* and *unc-30/PITX* Cooperate in *C. elegans* Embryonic  
1145 Progenitor Cells to Regulate Robust Development. *PLOS Genet*. 2015;11: e1005003.  
1146 doi:10.1371/journal.pgen.1005003
- 1147 40. Richards JL, Zacharias AL, Walton T, Burdick JT, Murray JI. A quantitative model of  
1148 normal *Caenorhabditis elegans* embryogenesis and its disruption after stress. *Dev Biol*.  
1149 2013;374: 12–23. doi:10.1016/j.ydbio.2012.11.034
- 1150 41. Maduro MF, Meneghini MD, Bowerman B, Broitman-Maduro G, Rothman JH. Restriction  
1151 of Mesendoderm to a Single Blastomere by the Combined Action of *SKN-1* and a *GSK-3 $\beta$*   
1152 Homolog Is Mediated by *MED-1* and *-2* in *C. elegans*. *Mol Cell*. 2001;7: 475–485.  
1153 doi:10.1016/S1097-2765(01)00195-2
- 1154 42. Maduro MF, Hill RJ, Heid PJ, Newman-Smith ED, Zhu J, Priess JR, et al. Genetic  
1155 redundancy in endoderm specification within the genus *Caenorhabditis*. *Dev Biol*.  
1156 2005;284: 509–522. doi:10.1016/j.ydbio.2005.05.016
- 1157 43. Boeck ME, Boyle T, Bao Z, Murray J, Mericle B, Waterston R. Specific roles for the  
1158 GATA transcription factors *end-1* and *end-3* during *C. elegans* E-lineage development.  
1159 *Spec Sect Hist Dev Biol*. 2011;358: 345–355. doi:10.1016/j.ydbio.2011.08.002
- 1160 44. Good K, Ciosk R, Nance J, Neves A, Hill RJ, Priess JR. The T-box transcription factors  
1161 *TBX-37* and *TBX-38* link *GLP-1/Notch* signaling to mesoderm induction in *C. elegans*  
1162 embryos. *Development*. 2004;131: 1967–1978. doi:10.1242/dev.01088
- 1163 45. Andachi Y. *Caenorhabditis elegans* T-box genes *tbx-9* and *tbx-8* are required for formation  
1164 of hypodermis and body-wall muscle in embryogenesis. *Genes Cells*. 2004;9: 331–344.  
1165 doi:10.1111/j.1356-9597.2004.00725.x
- 1166 46. Neves A, Priess JR. The REF-1 Family of bHLH Transcription Factors Pattern *C. elegans*  
1167 Embryos through Notch-Dependent and Notch-Independent Pathways. *Dev Cell*. 2005;8:  
1168 867–879. doi:10.1016/j.devcel.2005.03.012
- 1169 47. Siepel A, Bejerano G, Pedersen JS, Hinrichs AS, Hou M, Rosenbloom K, et al.  
1170 Evolutionarily conserved elements in vertebrate, insect, worm, and yeast genomes. *Genome*  
1171 *Res*. 2005;15: 1034–1050. doi:10.1101/gr.3715005
- 1172 48. Pollard KS, Hubisz MJ, Rosenbloom KR, Siepel A. Detection of nonneutral substitution  
1173 rates on mammalian phylogenies. *Genome Res*. 2010;20: 110–121.  
1174 doi:10.1101/gr.097857.109
- 1175 49. Kent WJ, Sugnet CW, Furey TS, Roskin KM, Pringle TH, Zahler AM, et al. The Human  
1176 Genome Browser at UCSC. *Genome Res*. 2002;12: 996–1006. doi:10.1101/gr.229102



- 1177 50. Charest J, Daniele T, Wang J, Bykov A, Mandlbauer A, Asparuhova M, et al.  
1178 Combinatorial Action of Temporally Segregated Transcription Factors. *Dev Cell*. 2020;55:  
1179 483-499.e7. doi:10.1016/j.devcel.2020.09.002
- 1180 51. LaBonty M, Szmygiel C, Byrnes LE, Hughes S, Woollard A, Cram EJ. CACN-1/Cactin  
1181 plays a role in Wnt signaling in *C. elegans*. *PloS One*. 2014;9.  
1182 doi:10.1371/journal.pone.0101945
- 1183 52. Murray JI, Preston E, Crawford JP, Rumley JD, Amom P, Anderson BD, et al. The anterior  
1184 Hox gene *ceh-13* and *elt-1/GATA* activate the posterior Hox genes  
1185 *nob-1* and *php-3* to specify posterior lineages in the *C.*  
1186 *elegans* embryo. *bioRxiv*. 2021; 2021.02.09.430385. doi:10.1101/2021.02.09.430385
- 1187 53. Poole RJ, Hobert O. Early Embryonic Programming of Neuronal Left/Right Asymmetry in  
1188 *C. elegans*. *Curr Biol*. 2006;16: 2279–2292. doi:10.1016/j.cub.2006.09.041
- 1189 54. Fukushige T, Brodigan TM, Schriefer LA, Waterston RH, Krause M. Defining the  
1190 transcriptional redundancy of early bodywall muscle development in *C. elegans*: evidence  
1191 for a unified theory of animal muscle development. *Genes Dev*. 2006;20: 3395–3406.  
1192 doi:10.1101/gad.1481706
- 1193 55. Fukushige T, Krause M. The myogenic potency of HLH-1 reveals wide-spread  
1194 developmental plasticity in early *C. elegans* embryos. *Dev Camb Engl*. 2005;132: 1795–  
1195 1805. doi:10.1242/dev.01774
- 1196 56. Simonis N, Rual J-F, Carvunis A-R, Tasan M, Lemmens I, Hirozane-Kishikawa T, et al.  
1197 Empirically controlled mapping of the *Caenorhabditis elegans* protein-protein interactome  
1198 network. *Nat Methods*. 2009;6.
- 1199 57. Tintori SC, Osborne Nishimura E, Golden P, Lieb JD, Goldstein B. A Transcriptional  
1200 Lineage of the Early *C. elegans* Embryo. *Dev Cell*. 2016;38: 430–444.  
1201 doi:10.1016/j.devcel.2016.07.025
- 1202 58. Whiting J, Marshall H, Cook M, Krumlauf R, Rigby PW, Stott D, et al. Multiple spatially  
1203 specific enhancers are required to reconstruct the pattern of Hox-2.6 gene expression.  
1204 *Genes Dev*. 1991;5: 2048–2059. doi:10.1101/gad.5.11.2048
- 1205 59. Epstein DJ, McMahon AP, Joyner AL. Regionalization of Sonic hedgehog transcription  
1206 along the anteroposterior axis of the mouse central nervous system is regulated by Hnf3-  
1207 dependent and -independent mechanisms. *Development*. 1999;126: 281–292.  
1208 doi:10.1242/dev.126.2.281
- 1209 60. Teng Y, Girard L, Ferreira HB, Sternberg PW, Emmons SW. Dissection of cis-regulatory  
1210 elements in the *C. elegans* Hox gene *egl-5* promoter. *Dev Biol*. 2004;276: 476–492.  
1211 doi:10.1016/j.ydbio.2004.09.012
- 1212 61. Streit A, Kohler R, Marty T, Belfiore M, Takacs-Vellai K, Vigano M-A, et al. Conserved  
1213 Regulation of the *Caenorhabditis elegans* labial/Hox1 Gene *ceh-13*. *Dev Biol*. 2002;242:

- 1214 96–108. doi:10.1006/dbio.2001.0544
- 1215 62. Landmann F, Quintin S, Labouesse M. Multiple regulatory elements with spatially and  
1216 temporally distinct activities control the expression of the epithelial differentiation gene *lin-*  
1217 *26* in *C. elegans*. *Dev Biol.* 2004;265: 478–490. doi:10.1016/j.ydbio.2003.09.009
- 1218 63. Chen RA-J, Down TA, Stempor P, Chen QB, Egelhofer TA, Hillier LW, et al. The  
1219 landscape of RNA polymerase II transcription initiation in *C. elegans* reveals promoter and  
1220 enhancer architectures. *Genome Res.* 2013;23: 1339–1347. doi:10.1101/gr.153668.112
- 1221 64. Serizay J, Dong Y, Jänes J, Chesney M, Cerrato C, Ahringer J. Distinctive regulatory  
1222 architectures of germline-active and somatic genes in *C. elegans*. *Genome Res.* 2020;30:  
1223 1752–1765. doi:10.1101/gr.265934.120
- 1224 65. Bertrand V, Hobert O. Linking asymmetric cell division to the terminal differentiation  
1225 program of postmitotic neurons in *C. elegans*. *Dev Cell.* 2009;16: 563–575.  
1226 doi:10.1016/j.devcel.2009.02.011
- 1227 66. Kuersten S, Segal SP, Verheyden J, LaMartina SM, Goodwin EB. NXF-2, REF-1, and  
1228 REF-2 Affect the Choice of Nuclear Export Pathway for *tra-2* mRNA in *C. elegans*. *Mol*  
1229 *Cell.* 2004;14: 599–610. doi:10.1016/j.molcel.2004.05.004
- 1230 67. Clark E, Akam M. Odd-paired controls frequency doubling in *Drosophila* segmentation by  
1231 altering the pair-rule gene regulatory network. Wittkopp PJ, editor. *eLife.* 2016;5: e18215.  
1232 doi:10.7554/eLife.18215
- 1233 68. Yoon Y, Klomp J, Martin-Martin I, Criscione F, Calvo E, Ribeiro J, et al. Embryo polarity  
1234 in moth flies and mosquitoes relies on distinct old genes with localized transcript isoforms.  
1235 Wittkopp PJ, Pick L, Popadic A, Akam M, editors. *eLife.* 2019;8: e46711.  
1236 doi:10.7554/eLife.46711
- 1237 69. Kamath RS, Fraser AG, Dong Y, Poulin G, Durbin R, Gotta M, et al. Systematic functional  
1238 analysis of the *Caenorhabditis elegans* genome using RNAi. *Nature.* 2003;421: 231–237.  
1239 doi:10.1038/nature01278
- 1240 70. Vora S, Phillips BT. Centrosome-Associated Degradation Limits  $\beta$ -Catenin Inheritance by  
1241 Daughter Cells after Asymmetric Division. *Curr Biol.* 2015;25: 1005–1016.  
1242 doi:10.1016/j.cub.2015.02.020
- 1243 71. Weirauch MT, Yang A, Albu M, Cote AG, Montenegro-Montero A, Drewe P, et al.  
1244 Determination and inference of eukaryotic transcription factor sequence specificity. *Cell.*  
1245 2014;158: 1431–1443. doi:10.1016/j.cell.2014.08.009
- 1246 72. Narasimhan K, Lambert SA, Yang AWH, Riddell J, Mnaimneh S, Zheng H, et al. Mapping  
1247 and analysis of transcription factor sequence specificities. *eLife.* 2015;4:  
1248 doi:10.7554/eLife.06967
- 1249 73. Bao Z, Murray JI. Mounting *Caenorhabditis elegans* Embryos for Live Imaging of

1250 Embryogenesis. Cold Spring Harb Protoc. 2011;2011: pdb.prot065599.  
1251 doi:10.1101/pdb.prot065599
